1  
2 **Research Advance to Putzbach et al., eLife. 2017; 6.**  
3  
4

5  
6 **CD95L mRNA is toxic to cells**  
7

8  
9 William Putzbach<sup>1,4</sup>, Ashley Haluck-Kangas<sup>1,4</sup>, Quan Q. Gao<sup>1</sup>, Aishe A. Sarshad<sup>3</sup>,  
10 Elizabeth T. Bartom<sup>2</sup>, Austin Stults<sup>1</sup>, Abdul S. Qadir<sup>1</sup>,  
11 Markus Hafner<sup>3</sup> and Marcus E. Peter<sup>1,2,\*</sup>  
12

13 <sup>1</sup>Department of Medicine/Division Hematology/Oncology, Feinberg School of Medicine, and <sup>2</sup>  
14 Department of Biochemistry and Molecular Genetics, Northwestern University, Chicago, IL  
15 60611, USA; <sup>3</sup> Laboratory of Muscle Stem Cells and Gene Regulation, NIAMS, NIH, Bethesda,  
16 MD 20892, USA.  
17

18  
19 \*Corresponding author: Marcus Peter, E-mail: m-peter@northwestern.edu, phone: 312-503-  
20 1291; FAX: 312-503-0189.  
21

22 <sup>4</sup> Shared first authorship  
23

24 Keywords:  
25 RNAi, Fas, cancer, CRISPR, cell death, DISE  
26  
27  
28

29 **Abstract**

30 CD95/Fas ligand binds to the death receptor CD95/Fas to induce apoptosis in sensitive cells. We  
31 previously reported the CD95L mRNA is enriched in sequences that, when converted to  
32 si/shRNAs, are toxic to cells (Putzbach et al., 2017). These si/shRNAs kill all cancer cells  
33 through a RNAi off-target effect by targeting critical survival genes. We now report expression  
34 of full-length CD95L mRNA, itself, is highly toxic to cells and induces a similar form of cell  
35 death. We demonstrate that small RNAs derived from CD95L are loaded into the RNA induced  
36 silencing complex (RISC) and that the RISC is required for the toxicity. Drosha and Dicer  
37 knock-out cells are highly sensitive to this toxicity, suggesting that processing of CD95L mRNA  
38 into small toxic RNAs is independent of both Dicer and Drosha. The data provide evidence that a  
39 higher vertebrate transgene can be processed to RNAi-active small RNAs that elicit cellular  
40 responses.

41

## 42 **Introduction**

43 Activation of CD95/Fas through interaction with its cognate ligand CD95L or receptor-activating  
44 antibodies induces apoptosis in sensitive cells (Suda, Takahashi, Golstein, & Nagata, 1993).  
45 Virtually all research on CD95 and CD95L has focused on the physical interaction between the  
46 two proteins and the subsequent protein-based signaling cascades (Algeciras-Schimnich et al.,  
47 2002; Fu et al., 2016; Nisihara et al., 2001; Schneider et al., 1997). However, we have recently  
48 shown that the mRNA of CD95 and CD95L harbor sequences that when converted into small  
49 interfering (si) or short hairpin (sh)RNAs, cause massive and robust toxicity in all tested cancer  
50 cells. These CD95/CD95L-derived si/shRNAs target a network of survival genes, resulting in the  
51 simultaneous activation of multiple cell death pathways through RNA interference (RNAi) in a  
52 process we called DISE (Death Induced by Survival gene Elimination) (Putzbach et al., 2017).  
53 We determined that for an si/shRNA to elicit this form of toxicity, only positions 2-7 of the guide  
54 strand, the 6mer seed sequence, are required (Putzbach et al., 2017). More recently, a screen of  
55 all 4096 6mer seeds revealed that optimal 6mer seed toxicity requires G-rich seeds targeting C-  
56 rich regions in the 3'UTRs of survival genes (Gao et al., 2018).

57 In this report, we show that expression of the CD95L mRNA, itself, is toxic to cells even  
58 without prior conversion to siRNAs. This toxicity is independent of the full-length CD95L  
59 protein or expression of the CD95 receptor and resembles DISE. The toxicity involves RNAi,  
60 and multiple small RNAs generated within cells from the mRNA of CD95L are loaded into the  
61 RNA-induced Silencing Complex (RISC), the key mediator of RNAi (Liu et al., 2004).

62

## 63 **Results**

### 64 **CD95L mRNA is toxic to cells**

65 By testing every possible shRNA derived from the CD95L open reading frame (ORF) or its  
66 3'UTR, we recently found a high enrichment of toxic si/shRNAs derived from the CD95L ORF  
67 (Putzbach et al., 2017). Most recently we determined that the 6mer seed toxicity observed in  
68 many si/shRNAs is due to their nucleotide composition, with G-rich seeds being the most toxic  
69 (Gao et al., 2018). When reanalyzing the CD95L ORF-derived shRNAs, we found a significant  
70 correlation between the toxicity of the most toxic CD95L-derived shRNAs (Putzbach et al.,  
71 2017) and the seed toxicity of the same 6mer seed we recently determined in a screen of all 4096  
72 6mer seeds (Gao et al., 2018). This suggests that CD95L-derived shRNAs kill cancer cells  
73 mainly through 6mer seed toxicity.

74 We therefore wondered whether expression of the CD95L ORF mRNA—without pre-  
75 processing into artificial siRNAs—would be toxic to cells. Expression of CD95L protein in most  
76 cells kills through induction of apoptosis. Consequently, expressing CD95L in HeyA8 cells,  
77 which are highly sensitive to CD95 mediated apoptosis, killed cells within a few hours after  
78 infection with a lentivirus encoding CD95L (**Figure 1A**, left panel). Interestingly, severe growth  
79 reduction was seen without any signs of apoptosis (not shown) when a CD95L mutant, unable to  
80 bind CD95, was expressed (CD95L<sup>MUT</sup> in **Figure 1A**, left panel). This mutant carries a Y218R  
81 point mutation, which prevents the CD95L protein from binding to CD95 (Schneider et al.,  
82 1997), and is expressed at a similar level to wild type (wt) CD95L (**Figure 1B**). To prevent the  
83 CD95L mRNA from producing full-length CD95L protein, we also introduced a premature stop  
84 codon right after the start codon in the CD95L<sup>MUT</sup> vector (CD95L<sup>MUT</sup>NP). This construct  
85 (containing 4 point mutations and confirmed to produce mRNA with no detectable full-length  
86 CD95L protein, **Figure 1B**) was equally active in reducing the growth of HeyA8 cells when  
87 compared to the CD95L<sup>MUT</sup> vector (**Figure 1A**, left panel). This result suggested that the CD95L  
88 mRNA could be toxic to HeyA8 cells without the CD95L protein inducing apoptosis. This was  
89 confirmed by expressing the three CD95L constructs in the presence of the oligo-caspase  
90 inhibitor zVAD-fmk (**Figure 1A**, center panel). With suppressed apoptosis, all three constructs  
91 were now equally toxic to HeyA8 cells. Finally, we tested a HeyA8 CD95 k.o. clone confirmed  
92 to express no CD95 protein (Putzbach et al., 2017). In these cells, without the addition of zVAD-  
93 fmk, wt CD95L and CD95L<sup>MUT</sup>NP were again equally active in severely reducing the growth of  
94 the cells (**Figure 1A**, right panel). Together, these data suggested it is the CD95L mRNA that  
95 killed the cells. Cell death was confirmed by quantifying nuclear fragmentation (**Figure 1C**). We  
96 also detected a significant increase of ROS in cells expressing CD95L<sup>MUT</sup>NP (**Figure 1D**), which  
97 is a characteristic feature of DISE (Hadji et al., 2014; Patel & Peter, 2017). To exclude the  
98 possibility that truncated CD95 protein or any part of the CD95 mRNA would play a role in this  
99 toxicity, we deleted the CD95 gene in MCF-7 cells (**Figure 1 - figure supplement 1A-E**).  
100 Overexpression of wild-type CD95L killed clone FA4 cells, which harbor a complete  
101 homozygous deletion of the entire CD95 gene, as well as CD95 protein k.o. clone #21 cells that  
102 retain some truncated mRNA expression (**Figure 1E**). To further distinguish the activities of the  
103 CD95L mRNA from CD95L protein, we generated a CD95L expression construct in which we  
104 introduced 308 (out of 846 nucleotides) silent mutations (CD95L SIL) (**Figure 1 - figure**  
105 **supplement 2A**). The activity of this mutant construct to negatively affect cell growth of CD95

106 k.o. HeyA8 cells was compared to two independently cloned wt CD95L constructs (WT1 and  
107 WT2 in *Figure 1 - figure supplement 2B*). The mutant SIL construct was equally effective in  
108 suppressing cell growth and produced about the same amount of CD95L mRNA (*Figure 1 -*  
109 *figure supplement 2C*). However, the SIL construct only produced about 12 % of WT CD95L  
110 protein (*Figure 1 - figure supplement 2C*), again supporting the observation that it is the CD95L  
111 RNA and not the protein that elicits toxicity.

112

### 113 **CD95L mRNA kills cells through DISE.**

114 After infection with CD95L, CD95 k.o. HeyA8 cells exhibited morphological changes strikingly  
115 similar to the changes seen in wt HeyA8 cells after introduction of a CD95L-derived shRNA  
116 (shL3) (*Figure 2A, Video 1-4*) suggesting the cells died through a similar mechanism. To  
117 determine the cause of cell death induced by CD95L mRNA in HeyA8 CD95 k.o. cells  
118 molecularly, we performed an RNA-Seq analysis. We found that expression of CD95L caused  
119 preferential downregulation of critical survival genes and not of nonsurvival genes in a control  
120 set (*Figure 2B*). In addition, cell death induced by CD95L mRNA resulted in a substantial loss  
121 of 11 of the 12 histones detected to be downregulated in cells treated with CD95 and CD95L-  
122 derived sh/siRNAs (*Figure 2C*). Loss of histons is an early event during DISE (Putzbach et al.,  
123 2017). A Metascape analysis demonstrated that nucleosome assembly, regulation of mitosis, and  
124 genes consistent with the involvement of histones were among the most significantly  
125 downregulated RNAs across all cells in which DISE was induced by any of the four sh/siRNAs  
126 or by the expression of CD95L mRNA (*Figure 2D*). This suggests that CD95L mRNA kills cells  
127 in the same way as CD95/L-derived si/shRNAs.

128

### 129 **CD95L mRNA kills cells through RNAi**

130 Given our previous work on CD95L-derived si/shRNA toxicity, we hypothesized that CD95L  
131 mRNA kills cells through an RNAi-based mechanism—perhaps by being processed into small  
132 RNAs that incorporate into the RISC. Drosha k.o. cells lacking the majority of endogenous  
133 miRNAs, but retaining expression of Ago proteins, were shown to be hypersensitive to DISE  
134 induced by si- and shRNAs (Putzbach et al., 2017). We interpreted this effect as being caused by  
135 an increased pool of unoccupied RNAi machinery caused by the absence of most miRNAs.  
136 Drosha k.o. cells were also hypersensitive to the expression of CD95L<sup>MUT</sup>NP (*Figure 3A*,  
137  $p=0.014$ , according to a polynomial fitting model); Virtually all cells died (insert in *Figure 3A*).

138 To directly determine whether the RISC is involved in the toxicity, we introduced CD95L into  
139 CD95 k.o. HeyA8 cells after knocking down AGO2 (**Figure 3B**). Knock down of AGO2 was  
140 efficient (insert in **Figure 3B**). Toxicity elicited by CD95L was severely blunted following  
141 AGO2 knockdown, suggesting that AGO2 was required for CD95L mRNA to be toxic.

142 To test the hypothesis that Drosha k.o. cells were more sensitive because their RISC was not  
143 occupied by large amounts of nontoxic miRNAs and to determine whether CD95L mRNA could  
144 give rise to small RNAs that incorporate into the RISC, we pulled down AGO1-4-associated  
145 RNAs and analyzed their composition in wt and Drosha k.o. cells after expressing the  
146 CD95L<sup>MUT</sup>NP mRNA. For the pull-down, we used a peptide—derived from the AGO-binding  
147 partner GW182—recently described to bind to all four Ago proteins (Hauptmann et al., 2015).  
148 As expected in wt HCT116 cells, large amounts of small RNAs (19-23nt in length) were detected  
149 bound to the Ago proteins (**Figure 3C**). Both AGO1 and AGO2 were efficiently pulled down. In  
150 contrast, in the Drosha k.o. cells, which cannot generate canonical miRNAs, only a low amount  
151 of small RNAs was detected, confirming the absence of miRNAs in the RISC. Surprisingly, the  
152 amount of pulled down Ago proteins was severely reduced despite the fact these Drosha k.o.  
153 cells express comparable levels of AGO2 (Putzbach et al., 2017). This suggests the peptide did  
154 not have access to the Ago proteins in Drosha k.o. cells, presumably because it only binds to Ago  
155 proteins complexed with RNA as recently shown (Elkayam et al., 2017).

156 The analysis of all Ago-bound RNAs showed that in the wt cells, >98.4% of bound RNAs  
157 were miRNAs. In contrast, only 34% of bound RNAs were miRNAs in Drosha k.o. cells (**Figure**  
158 **3D** and data not shown). These include miRNAs that are processed independently of Drosha  
159 such as miR-320a (Kim, Kim, & Kim, 2016). Consistently, this miRNA became a major RNA  
160 species bound to Ago proteins in Drosha k.o. cells (**Figure 3D**). In both wt and Drosha k.o. cells,  
161 a significant increase in CD95L-derived small RNAs bound to the Ago proteins was detected  
162 compared to cells infected with pLenti empty vector. They corresponded to 0.0006% and 0.043%  
163 of all the Ago-bound RNAs in the wt cells and Drosha k.o. cells, respectively. Toxicity of  
164 CD95L mRNA was, therefore, not due to overloading the RISC. In the absence of most  
165 miRNAs, the total amount of RNAs bound to Ago proteins in the Drosha k.o. cells was roughly  
166 10% of the amount bound to Ago in wt cells (**Figure 3D**). The reduction of Ago-bound miRNAs  
167 in Drosha k.o. cells (**Figure 3E**, top row) was paralleled by a substantial increase in binding of  
168 other small RNAs to the Ago proteins (**Figure 3E**, bottom row). Interestingly, the amount of  
169 Ago-bound CD95L-derived small RNAs was >100 times higher in the Drosha k.o. cells

170 compared to the wt cells (red columns in **Figure 3E**). These data support our hypothesis that  
171 Drosha k.o. cells are more sensitive to CD95L mRNA-mediated toxicity due to their ability to  
172 take up more toxic small CD95L-derived RNAs into the RISC in the absence of most miRNAs.

173

#### 174 **CD95L ORF is degraded into small RNA fragments that are then loaded into the RISC.**

175 Interestingly, not only did Ago proteins in Drosha k.o. cells bind much more CD95L-derived  
176 small RNAs than in the wt cells, but also the peak length of the most abundant Ago-bound RNA  
177 species increased from 20 to 23 nt (**Figure 4A**, top panel). To determine the sites within the  
178 CD95L mRNA that gave rise to small Ago-bound RNAs, we aligned all small Ago-bound RNAs  
179 detected in all conditions to the CD95L ORF sequence (**Figure 4B and C**). We identified 22  
180 regions in the CD95L ORF that gave rise to small RNAs that could be bound by Ago proteins  
181 (**Figure 4B**). To determine whether these small RNAs were formed in the cytosol and then  
182 loaded into the RISC, we also aligned all small RNAs in the total RNA fraction isolated from  
183 CD95L<sup>MUT</sup>NP expressing HCT116 Drosha k.o. cells with CD95L (**Figure 4C**). Interestingly,  
184 very similar regions of small RNAs were found. Moreover, the mean as well as the peak of the  
185 distribution of the read lengths of small RNAs bound to Ago proteins was smaller than in the  
186 total small RNAs fraction (**Figure 4A**, center panel), suggesting these fragments were trimmed  
187 to the appropriate length either right before they are loaded into the RISC or by the RISC itself.  
188 This was most obvious for the small RNAs in cluster 3 (**Figure 4B and C**). We also noticed that  
189 certain small RNAs were more abundant in the Ago-bound fraction when compared to total RNA  
190 relative to all other RNAs. To determine whether this type of processing was specific for  
191 HCT116 Drosha k.o. cells, we analyzed the Ago-bound small CD95L-derived RNAs in HeyA8  
192 CD95 k.o. cells after expression of wt CD95L (**Figure 4D**) and compared them with the total  
193 RNA fraction (**Figure 4E**). While we found fewer CD95L-derived reads in these cells, the  
194 general location of some of the read clusters overlapped with the ones found in the Drosha k.o.  
195 cells and again both the mean and peak of the distribution of RNA lengths was smaller in the  
196 Ago-bound fraction versus the total RNA fraction (**Figure 4A**, bottom panel). Together, these  
197 data suggest that CD95L mRNA can be processed into smaller RNA fragments, which are then  
198 trimmed to a length appropriate for incorporation into the RISC.

199 Our data suggest that the CD95L mRNA, when overexpressed, is toxic to cells due to the  
200 formation of Ago-bound small RNAs that are incorporated into the RISC and kill cells through  
201 RNAi. This process is independent of Drosha. To determine whether Dicer is required for either



202 processing of CD95L mRNA or loading the small RNAs into the RISC, we expressed  
203 CD95L<sup>MUT</sup>NP in wt and Dicer k.o. HCT116 cells (**Figure 4F**). Dicer k.o. cells were still  
204 sensitive to toxicity induced by CD95L mRNA expression, suggesting the toxicity of the CD95L  
205 mRNA does not require the processing by either Drosha or Dicer. Using custom real-time qPCR  
206 primers designed to specifically detect the small RNAs from clusters 8 and 21, we detected, in  
207 both wt and Dicer k.o. cells over-expressing CD95L<sup>MUT</sup>NP, fragments from these clusters  
208 (**Figure 4G**), demonstrating that Dicer is not involved in processing CD95L mRNA.

209 All the reported small RNAs derived from CD95L corresponded to the sense strand of the  
210 expressed mRNA, raising the question of how they could be processed into double-stranded  
211 siRNAs in the absence of an antisense strand. To get a preliminary answer to this question, we  
212 subjected the CD95L ORF mRNA sequence to a secondary structure prediction (**Figure 4 -**  
213 **figure supplement 1A**). According to this analysis, the CD95L ORF mRNA forms a tightly  
214 folded structure with many of the small RNAs of the 22 clusters juxtaposing each other in stem-  
215 like structures creating regions of significant complementarity. These may provide the duplexes  
216 needed to be processed and loaded into the RISC. Interestingly, many of the juxtaposing reads  
217 were found in duplex structures with 3' overhangs. Three of these oligonucleotides (derived from  
218 clusters 7, 15 and 22) when expressed as siRNAs were toxic to HeyA8, H460, M565 and 3LL  
219 cells (**Figure 4 - figure supplement 1B**).

220 In summary, our data suggest that si- and/or shRNAs with certain seed sequences as they are  
221 present in CD95 and CD95L and the entire CD95L ORF are toxic to cancer cells. The CD95L  
222 mRNA is broken down into small RNA-active fragments that are loaded into the RISC and then  
223 target critical survival genes. This results in cell death through 6mer seed toxicity. The process is  
224 independent of both Drosha and Dicer. Finally, the data suggest that a high miRNA content, by  
225 "filling up" the RISC, might render cells less sensitive to this form of cell death.

226

## 227 **Discussion**

228 We recently reported a novel form of cell death that was observed after expression of si/shRNAs  
229 designed from the sequences of CD95/CD95L mRNA (Putzbach et al., 2017). More recently we  
230 described that cells die from a loss of multiple survival genes through a mechanism we call 6mer  
231 seed toxicity (Gao et al., 2018). The most toxic si/shRNAs derived from CD95 or CD95L were  
232 found in the ORF of CD95L (Putzbach et al., 2017). This pointed toward the CD95L mRNA,  
233 itself being toxic.



234 We now show that expression of full-length CD95L mRNA triggers toxicity that is  
235 independent of the protein product and canonical apoptosis. This is intriguing considering  
236 previous studies showed transgenic expression of CD95L using viruses killed multiple cancer  
237 cells that were completely resistant to CD95 mediated apoptosis after addition of agonist anti-  
238 CD95 antibodies (ElOjeimy et al., 2006; Hyer, Voelkel-Johnson, Rubinchik, Dong, & Norris,  
239 2000; Sudarshan et al., 2005; Sun et al., 2012). These results were interpreted as intracellular  
240 CD95L triggering apoptosis. However, we now provide an alternate explanation—namely, both  
241 the CD95L protein *and* mRNA are toxic to cells through distinct mechanisms. The protein  
242 induces apoptosis, and the mRNA induces toxicity through an RNAi-based mechanism.

243 We demonstrate that Dicer and Drosha are not involved in generating the Ago-bound  
244 CD95L-derived fragments but there are several candidate RNases that are capable of processing  
245 mRNAs. Given the differences in length distribution between the cytosolic versus Ago-bound  
246 RNA fragments, it is likely the released CD95L-derived fragment intermediates are incorporated  
247 into the RISC and then trimmed to the appropriate length by Ago. Indeed, a similar mechanism is  
248 known to occur during the maturation of the erythropoietic miR-451, where the pre-miRNA is  
249 first cleaved by AGO2 and then trimmed at the 3' end to the final mature form by the  
250 exoribonuclease PARN (Yoda et al., 2013). Furthermore, a similar process occurs with the  
251 recently identified class of Ago-bound RNAs called agotrons (Hansen et al., 2016), which  
252 consist of an excised intron loaded into the RISC in a manner independent of Drosha or Dicer  
253 pre-processing. After trimmed to the appropriate size, the guide RNAs in complex with the RISC  
254 can regulate gene expression through RNAi.

255 Our data provide the first evidence of an overexpressed cDNA to be toxic via an RNAi-  
256 dependent mechanism. It was first shown in plants that overexpressed transgenes can be  
257 converted into RNAi active short RNA sequences (Hamilton & Baulcombe, 1999). Our data on  
258 the effects of overexpressed CD95L RNA, while mechanistically distinct from what was  
259 reported in plants, maybe the first example of transgene determining cell fate through the RNAi  
260 mechanism in mammalian cells.

261 A major question that arises from our data is whether CD95L mRNA is toxic *in vivo*. We and  
262 others have noticed upregulation of CD95L in multiple stress-related conditions such as after  
263 treatment with chemotherapy ((Friesen, Fulda, & Debatin, 1999) and data not shown). While the  
264 amount of CD95L mRNA and the level of upregulation alone may not be enough to be toxic, it  
265 could be the combination of multiple RNA fragments, derived from multiple different mRNAs

266 that are generated to kill cells (Putzbach et al., 2018). We view CD95L as just one of many  
267 RNAs that have this activity. Indeed, it is unlikely CD95L is the only gene whose mRNA is toxic  
268 to cells, as this mRNA-based level of toxicity would be redundant with the potent killing  
269 capacity of the CD95L protein. Also, upregulating an mRNA that, by itself, could decimate the  
270 cells that would otherwise need to upregulate that mRNA to carry out their biological function in  
271 the first place, such as activated T cells upregulating CD95L to mount an immune response,  
272 would be self-defeating. Therefore, nature likely distributed this mRNA-based toxicity-inducing  
273 capacity over many genes in the genome to prevent activating it when any one of those genes is  
274 upregulated during specific cellular processes. It is more likely there exists an entire network of  
275 these genes that can release toxic small RNAs when the appropriate stimulus is encountered.  
276 Consistent with this hypothesis we recently identified other genes that contain sequences that  
277 when converted to shRNAs kill cancer cells through 6mer seed toxicity (Patel & Peter, 2017).  
278 Future work will be aimed at identifying additional genes and the mechanism through which they  
279 are processed and under what conditions to kill cells.  
280

281 **Materials and methods**

**Key Resources Table**

| <b>Reagent type (species) or resource</b> | <b>Designation</b>                 | <b>Source or reference</b> | <b>Identifiers</b> | <b>Additional information</b>                                                                                                                                                                                                                                   |
|-------------------------------------------|------------------------------------|----------------------------|--------------------|-----------------------------------------------------------------------------------------------------------------------------------------------------------------------------------------------------------------------------------------------------------------|
| Gene (Homo sapiens)                       | CD95L                              | NA                         | NM_000639          |                                                                                                                                                                                                                                                                 |
| Gene (H. sapiens)                         | CD95                               | NA                         | NM_000043          |                                                                                                                                                                                                                                                                 |
| Cell line (H. sapiens)                    | MCF-7                              | ATCC                       | ATCC: HTB-22       | Human adenocarcinoma of the mammary gland, breast; derived from metastatic site: pleural effusion                                                                                                                                                               |
| Cell line (H. sapiens)                    | MCF-7 CD95 $\Delta$ shR6 clone #21 | this paper                 | NA                 | MCF-7 CD95 $\Delta$ shR6 clone #21 with homozygous 227 nucleotide deletion of the shR6 target site in CD95 (chr10:89,008,920-89,009,146; Human Dec. 2013 GRCh38/hg38 assembly) produced using CRISPR/Cas9 technology; verified homozygous CD95 protein knockout |
| Cell line (H. sapiens)                    | MCF-7 CD95 deletion clone FA4      | this paper                 | NA                 | MCF-7 CD95 deletion clone FA4 with a homozygous deletion of the entire CD95 gene (chr10:88,990,657 - 89,015,785; Human Dec. 2013 GRCh38/hg38 assembly) produced using CRISPR/Cas9 technology; verified homozygous CD95 protein knockout                         |
| Cell line (H. sapiens)                    | HeyA8                              | PMID: 4016745              | RRID: CVCL_8878    | Human high grade ovarian serous adenocarcinoma; derived from parent Hey cells (RRID: CVCL_0297)                                                                                                                                                                 |

|                          |                                                         |                                                            |                                  |                                                                                                                                                                                                                                                      |
|--------------------------|---------------------------------------------------------|------------------------------------------------------------|----------------------------------|------------------------------------------------------------------------------------------------------------------------------------------------------------------------------------------------------------------------------------------------------|
| Cell line (H. sapiens)   | HeyA8 shR6 k.o. clone #11, HeyA8 CD95 k.o.              | PMID: 29063830                                             | NA                               | HeyA8 CD95 k.o. clone with a homozygous 227 nucleotide deletion of the shR6 target site in CD95 (chr10:89,008,920-89,009,146; Human Dec. 2013 GRCh38/hg38 assembly) produced using CRISPR/Cas9 technology; verified homozygous CD95 protein knockout |
| Cell line (H. sapiens)   | HCT116                                                  | Korean Collection for Type Cultures (KCTC)                 | KCTC: cat#HC19023; ATCC: CCL_247 | Human colorectal carcinoma                                                                                                                                                                                                                           |
| Cell line (H. sapiens)   | Drosha <sup>-/-</sup> ; Drosha <sup>-/-</sup> clone #40 | Korean Collection for Type Cultures (KCTC); PMID: 26976605 | KCTC: cat#HC19020                | HCT116 clone #40 with homozygous protein knockout of Drosha; knockout achieved using CRISPR/Cas9 which resulted in a single nucleotide insertion in one allele and a 26 nucleotide deletion in the other                                             |
| Cell line (H. sapiens)   | Dicer <sup>-/-</sup> ; Dicer <sup>-/-</sup> clone #43   | Korean Collection for Type Cultures (KCTC); PMID: 26976606 | KCTC: cat#HC19023                | HCT116 clone #43 with homozygous protein knockout of Dicer; knockout achieved using CRISPR/Cas9 which resulted in a three nucleotide insertion and 14 nucleotide deletion in one allele and a 35 nucleotide deletion in the other                    |
| Cell line (H. sapiens)   | Dicer <sup>-/-</sup> ; Dicer <sup>-/-</sup> clone #45   | Korean Collection for Type Cultures (KCTC); PMID: 26976607 | KCTC: cat#HC19024                | HCT116 clone #45 with homozygous protein knockout of Dicer; knockout achieved using CRISPR/Cas9 which resulted in a 53 nucleotide deletion in one allele and a 28 nucleotide deletion in the other                                                   |
| Cell line (H. sapiens)   | 293T                                                    | ATCC                                                       | ATCC: CRL-3216                   | Derived from HEK293 cells (ATCC: CRL-1573); express large T antigen; used for packaging viruses                                                                                                                                                      |
| Cell line (H. sapiens)   | H460                                                    | ATCC                                                       | ATCC: #HTB-177                   | Human lung pleural effusion carcinoma                                                                                                                                                                                                                |
| Cell line (Mus musculus) | 3LL                                                     | ATCC                                                       | ATCC #CRL-1642                   | Mouse Lewis lung carcinoma                                                                                                                                                                                                                           |

|                             |                                            |                         |                                  |                                                                                                    |
|-----------------------------|--------------------------------------------|-------------------------|----------------------------------|----------------------------------------------------------------------------------------------------|
| Cell line (Mus musculus)    | M565                                       | PMID: 25366259          | NA                               | Mouse hepatocellular carcinoma isolated from naturally occurring tumor in a floxed CD95 background |
| Antibody                    | anti-human AGO1 (rabbit monoclonal)        | Cell Signaling          | Cell Signaling #5053             | 1:2000; for western blot; primary Ab                                                               |
| Antibody                    | anti-human AGO1 (rabbit polyclonal)        | Abcam                   | Abcam #98056                     | 1:2000; for western blot; primary Ab                                                               |
| Antibody                    | anti-human AGO2 (rabbit polyclonal)        | Abcam                   | Abcam #32381                     | 1:2000; for western blot; primary Ab                                                               |
| Antibody                    | Goat anti-rabbit, IgG-HRP                  | Southern Biotech        | Southern Biotech: cat#SB-4030-05 | 1:5000; for western blot; secondary Ab                                                             |
| Antibody                    | Goat anti-rabbit, IgG-HRP                  | Cell Signaling          | Cell Signaling: cat#7074         | 1:2000; for western blot; secondary Ab                                                             |
| Antibody                    | Goat anti-mouse; IgG1-HRP                  | Southern Biotech        | Southern BioTech: cat#1070-05    | 1:5000; for western blot; secondary Ab                                                             |
| Recombinant protein reagent | LzCD95L                                    | PMID: 14504390          | NA                               | Leucine zipper tagged CD95L; recombinant protein                                                   |
| Chemical compound           | CellTiter-Glo                              | Promega                 | Promega #G7570                   | Detects ATP release as a surrogate for cell death; read-out is fluorescence                        |
| Chemical compound           | propidium iodide                           | Sigma-Aldrich           | Sigma-Aldrich: cat#P4864         | Used for subG1 flow cytometry analysis                                                             |
| Chemical compound           | puromycin                                  | Sigma-Aldrich           | Sigma-Aldrich: cat#P9620         | Used for selection of cells expressing puromycin resistance cassettes                              |
| Chemical compound           | G418                                       | Affymetrix              | Affymetrix: cat#11379            | Used for selection of cells expressing G418 resistance cassette                                    |
| Chemical compound           | 2',7'-dichlorodihydrofluorescein diacetate | Thermofisher Scientific | Thermofisher Scientific #D399    | Dye used for detecting ROS production                                                              |

|                         |                                            |               |                         |                                                                                                                                                                                                                                                      |
|-------------------------|--------------------------------------------|---------------|-------------------------|------------------------------------------------------------------------------------------------------------------------------------------------------------------------------------------------------------------------------------------------------|
| Chemical compound       | zVAD-fmk                                   | Sigma-Aldrich | Sigma-Aldrich: cat#V116 | Used at 20uM; pan caspase inhibitor                                                                                                                                                                                                                  |
| Recombinant DNA reagent | pLenti-GIII-CMV-RFP-2A-Puro vector; pLenti | ABM Inc       | NA                      | pLenti control empty lentiviral vector; carries an RFP-2a-puromycin resistance cassette                                                                                                                                                              |
| Recombinant DNA reagent | pLenti-CD95L                               | this paper    | NA                      | pLenti-GIII-CMV-RFP-2A-Puro vector that expresses human wild type CD95L cDNA (NM_000639.2); used to express wt human CD95L upon infection with lentiviral particles                                                                                  |
| Recombinant DNA reagent | pLenti-CD95L <sup>MUT</sup>                | this paper    | NA                      | pLenti-GIII-CMV-RFP-2A-Puro vector that expresses human CD95L cDNA (NM_000639.2) with 2 nucleotide substitutions in codon 218 (TAT -> CGT) resulting in replacement of tyrosine for arginine (Y218R mutation); unable to bind CD95                   |
| Recombinant DNA reagent | pLenti-CD95L <sup>MUT</sup> NP             | this paper    | NA                      | pLenti-GIII-CMV-RFP-2A-Puro vector that expresses human CD95L cDNA (NM_000639.2) with both the Y218R mutation and a single nucleotide substitution at the second codon (CAG -> TAG), resulting in a premature stop codon right after the start codon |
| Recombinant DNA reagent | pLenti-CD95L <sup>SIL</sup>                | this paper    | NA                      | pLenti-GIII-CMV-RFP-2A-Puro vector that expresses human CD95L cDNA (NM_000639.2) with all codons containing synonymous mutations except for select codons in the proline-rich domain to meet IDT synthesis criteria                                  |

|                         |                                   |                               |                                          |                                                                                                                                                                                                                                                                                                                                                                                    |
|-------------------------|-----------------------------------|-------------------------------|------------------------------------------|------------------------------------------------------------------------------------------------------------------------------------------------------------------------------------------------------------------------------------------------------------------------------------------------------------------------------------------------------------------------------------|
| Transfected construct   | gRNA scaffold                     | PMID:<br>23287722             | IDT:<br>synthesized as gene block        | 455 nucleotide CRISPR/Cas9 gRNA scaffold synthesized as a gene block; contains promoter, gRNA scaffold, target sequence, and termination sequence; scaffold transcribes gRNAs that target Cas9 endonuclease to cut at target sites; target sequences consist of 19 nucleotides that are complementary to the target site of choice; co-transfected with Cas9 to catalyze cleavage. |
| Transfected construct   | pMJ920 Cas9 plasmid               | Addgene;<br>PMID:<br>23386978 | Addgene:<br>cat#42234                    | Plasmid that expresses a human codon-optimized Cas9 tagged with GFP and HA; used to express Cas9 for CRISPR-mediated deletions.                                                                                                                                                                                                                                                    |
| Chemical compound       | Lipofectamine 2000                | ThermoFisher Scientific       | ThermoFisher Scientific:<br>cat#11668019 | Transfection reagent                                                                                                                                                                                                                                                                                                                                                               |
| Chemical compound       | Lipofectamine RNAiMAX             | ThermoFisher Scientific       | ThermoFisher Scientific:<br>cat#13778150 | Transfection reagent; used for transfection of small RNAs such as siRNAs                                                                                                                                                                                                                                                                                                           |
| Commercial assay or kit | StrataClone Blunt PCR Cloning Kit | Agilent Technologies          | Agilent Technologies:<br>cat#240207      | Used to blunt-end clone the gRNA scaffolds into the pSC-B plasmid                                                                                                                                                                                                                                                                                                                  |
| Genetic reagent         | Taqman Gene expression master mix | ThermoFisher Scientific       | #4369016                                 |                                                                                                                                                                                                                                                                                                                                                                                    |
| Sequence-based reagent  | shR6 flanking Fr primer           | IDT                           | IDT: custom DNA oligo                    | Fr primer that flanks shR6 site; used to detect 227 nt shR6 deletion; 5'-GGTGT CATGCTGTGACTGT TG-3'                                                                                                                                                                                                                                                                                |
| Sequence-based reagent  | shR6 flanking Rev primer          | IDT                           | IDT: custom DNA oligo                    | Rev primer that flanks shR6 site; used to detect 227 nt shR6 deletion; 5'-TTAGCTTAAGTGGCCAGC AA-3'                                                                                                                                                                                                                                                                                 |



|                        |                          |                |                                                                        |                                                                                                                                                                              |
|------------------------|--------------------------|----------------|------------------------------------------------------------------------|------------------------------------------------------------------------------------------------------------------------------------------------------------------------------|
| Sequence-based reagent | shR6 internal Rev primer | IDT            | IDT: custom DNA oligo                                                  | Rev primer that overlaps with the shR6 site; used to detect 227 nt shR6 deletion; 5'-AAGTTGGTTTACATCTGCAC-3'                                                                 |
| Sequence-based reagent | CD95 flanking Fr primer  | IDT            | IDT: custom DNA oligo                                                  | Fr primer that flanks the CD95 gene; used to detect CD95 gene deletion; 5'-TGTTTAATATAGCTGGGGCTATGC-3'                                                                       |
| Sequence-based reagent | CD95 flanking Rev primer | IDT            | IDT: custom DNA oligo                                                  | Rev primer that flanks the CD95 gene; used to detect CD95 gene deletion; 5'-TGGGACTCATGGGTAAATAGAAT-3'                                                                       |
| Sequence-based reagent | CD95 internal Rev primer | IDT            | IDT: custom DNA oligo                                                  | Rev internal primer that targets within the CD95 gene; used to detect CD95 gene deletion; 5'-GACCAGTCTTCTCATTTCAGAGGT-3'                                                     |
| Sequence-based reagent | siScr                    | IDT; Dharmacon | Dharmacon #D-001810-02-05                                              | control non-targeting siRNA; sense: UGGUUACAUGUUGUGUGA                                                                                                                       |
| Sequence-based reagent | c7/1                     | IDT            | custom siRNA; antisense strand corresponds to cluster 7 CD95L sequence | antisense: 5'-AUUGGGCCUGGGGAUGUUU-3'; antisense strand designed with 3' deoxy AA; complementary sense strand has 3' deoxy TT and 2'-O-methylation at the first two positions |
| Sequence-based reagent | c7/2                     | IDT            | custom siRNA; antisense strand corresponds to cluster 7 CD95L sequence | antisense: 5'-CCUGGGGAUGUUUCAGCUC-3'; antisense strand designed with 3' deoxy AA; complementary sense strand has 3' deoxy TT and 2'-O-methylation at the first two positions |

|                        |       |     |                                                                         |                                                                                                                                                                               |
|------------------------|-------|-----|-------------------------------------------------------------------------|-------------------------------------------------------------------------------------------------------------------------------------------------------------------------------|
| Sequence-based reagent | c11   | IDT | custom siRNA; antisense strand corresponds to cluster 11 CD95L sequence | antisense: 5'-CCAACUCAAGGUCCAUGC C-3'; antisense strand designed with 3' deoxy AA; complementary sense strand has 3' deoxy TT and 2'-O-methylation at the first two positions |
| Sequence-based reagent | c15/1 | IDT | custom siRNA; antisense strand corresponds to cluster 15 CD95L sequence | antisense: 5'-AAACUGGGCUGUACUUUG U-3'; antisense strand designed with 3' deoxy AA; complementary sense strand has 3' deoxy TT and 2'-O-methylation at the first two positions |
| Sequence-based reagent | c15/2 | IDT | custom siRNA; antisense strand corresponds to cluster 15 CD95L sequence | antisense: 5'-AACUGGGCUGUACUUUGU A-3'; antisense strand designed with 3' deoxy AA; complementary sense strand has 3' deoxy TT and 2'-O-methylation at the first two positions |
| Sequence-based reagent | c16/1 | IDT | custom siRNA; antisense strand corresponds to cluster 16 CD95L sequence | antisense: 5'-CAACAACCUGCCCCUGAG C-3'; antisense strand designed with 3' deoxy AA; complementary sense strand has 3' deoxy TT and 2'-O-methylation at the first two positions |
| Sequence-based reagent | c16/2 | IDT | custom siRNA; antisense strand corresponds to cluster 16 CD95L sequence | antisense: 5'-AACUCUAAGCGUCCCCAG G-3'; antisense strand designed with 3' deoxy AA; complementary sense strand has 3' deoxy TT and 2'-O-methylation at the first two positions |

|                                |                                |                         |                                                                         |                                                                                                                                                                              |
|--------------------------------|--------------------------------|-------------------------|-------------------------------------------------------------------------|------------------------------------------------------------------------------------------------------------------------------------------------------------------------------|
| Sequence-based reagent         | c21                            | IDT                     | custom siRNA; antisense strand corresponds to cluster 21 CD95L sequence | antisense: 5'-UCAACGUAUCUGAGCUCUC-3'; antisense strand designed with 3' deoxy AA; complementary sense strand has 3' deoxy TT and 2'-O-methylation at the first two positions |
| Sequence-based reagent         | c22                            | IDT                     | custom siRNA; antisense strand corresponds to cluster 22 CD95L sequence | antisense: 5'-AAUCUCAGACGUUUUUCGG-3'; antisense strand designed with 3' deoxy AA; complementary sense strand has 3' deoxy TT and 2'-O-methylation at the first two positions |
| Sequence-based reagent         | siScr pool                     | Dharmacon               | D-001810-10                                                             | control non-targeting siRNA pool                                                                                                                                             |
| Sequence-based reagent         | SMARTpool siRNA targeting AGO2 | Dharmacon               | L-004639-00-0005                                                        | siRNA pool designed to target AGO2                                                                                                                                           |
| Sequence based reagent (human) | GAPDH primer                   | Thermofisher Scientific | Hs00266705_g1                                                           | RT-qPCR; control probe                                                                                                                                                       |
| Sequence based reagent (human) | CD95L primers                  | Thermofisher Scientific | Hs00181226_g1; Hs00181225_m1                                            | RT-qPCR                                                                                                                                                                      |
| Sequence based reagent (human) | CD95 primers                   | Thermofisher Scientific | Hs00531110_m1; Hs00236330_m1                                            | RT-qPCR                                                                                                                                                                      |
| Sequence based reagent (human) | CD95L <sup>SIL</sup> primer    | Thermofisher Scientific | assay ID: APNKTUD                                                       | Custom RT-qPCR primer designed using the Thermofisher Scientific design tool to detect CD95L <sup>SIL</sup> mRNA                                                             |

|                                |                                   |                         |                                  |                                                                                                                                                                                                                                                                                                                                              |
|--------------------------------|-----------------------------------|-------------------------|----------------------------------|----------------------------------------------------------------------------------------------------------------------------------------------------------------------------------------------------------------------------------------------------------------------------------------------------------------------------------------------|
| Sequence based reagent (human) | Cluster 8 CD95L small RNA primer  | Thermofisher Scientific | custom probe                     | Custom RT-qPCR primer designed using the Thermofisher Scientific design tool at <a href="https://www.thermofisher.com/order/custom-genomic-products/tools/small-rna">https://www.thermofisher.com/order/custom-genomic-products/tools/small-rna</a> to specifically detect small RNAs from cluster 8 of CD95L (5'-AAGGAGCTGGCAGAACTCGAGA-3') |
| Sequence based reagent (human) | Cluster 21 CD95L small RNA primer | Thermofisher Scientific | custom probe                     | Custom RT-qPCR primer designed using the Thermofisher Scientific design tool at <a href="https://www.thermofisher.com/order/custom-genomic-products/tools/small-rna">https://www.thermofisher.com/order/custom-genomic-products/tools/small-rna</a> to specifically detect small RNAs from cluster 21 of CD95L (5'-TCAACGTATCTGAGCTCTCTC-3') |
| Sequence based reagent (human) | z30 primer                        | Thermofisher Scientific | ThermoFisher Scientific #4427975 | RT-qPCR for small RNA; control probe                                                                                                                                                                                                                                                                                                         |
| Peptide, recombinant protein   | Flag-GST-T6B peptide              | PMID: 26351695          | NA                               | Peptide derived from GW182 used to pull down AGO1 to 4                                                                                                                                                                                                                                                                                       |
| Commercial assay or kit        | anti-Flag M2 magnetic beads       | Sigma-Aldrich           | Sigma-Aldrich #M8823             |                                                                                                                                                                                                                                                                                                                                              |

282

### 283 **Reagents and antibodies**

284 All reagents and antibodies were described previously (Putzbach et al., 2017) except those  
285 referenced in the following paragraphs.

286

### 287 **Cell lines**

288 HeyA8 (RRID:CVCL\_8878) and HeyA8 CD95 knock-out cells, HCT116 (ATCC #CCL-247;  
289 RRID:CVCL\_0291) and HCT116 Drosha knock-out and Dicer knock-out cells, MCF-7 cells  
290 (ATCC #HTB-22; RRID:CVCL\_0031), and 293T (ATCC #CRL-3216; RRID:CVCL\_0063)  
291 cells were cultured as described previously (Putzbach et al., 2017). The MCF-7 CD95 knock-out

292 and deletion cells were cultured in RPMI 1640 medium (Cellgro #10-040-CM), 10% heat-  
293 inactivated FBS (Sigma-Aldrich), 1% L-glutamine (Mediatech Inc), and 1%  
294 penicillin/streptomycin (Mediatech Inc). H460 (ATCC #HTB-177; RRID:CVCL\_0459) cells  
295 were cultured in RPMI1640 medium (Cellgro Cat#10-040) supplemented with 10% FBS (Sigma  
296 Cat#14009C) and 1% L-Glutamine (Corning Cat#25-005). 3LL cells (ATCC #CRL-1642;  
297 RRID:CVCL\_4358) were cultured in DMEM medium (Gibco Cat#12430054) supplemented  
298 with 10% FBS and 1% L-Glutamine. Mouse hepatocellular carcinoma cells M565 cells were  
299 described previously (Ceppi et al., 2014) and cultured in DMEM/F12 (Gibco Cat#11330)  
300 supplemented with 10% FBS, 1% L-Glutamine and ITS (Corning #25-800-CR). All cell lines  
301 were authenticated using STR profiling and tested monthly for mycoplasma using Plasmotest  
302 (Invitrogen).

303

### 304 **Plasmids and constructs**

305 The pLenti-CD95L was synthesized by sub-cloning an insert containing the CD95L ORF  
306 (NM\_000639.2; synthesized by IDT as minigene with flanking 5' NheI RE site and 3' XhoI RE  
307 sites in pIDTblue vector) into the pLenti-GIII-CMV-RFP-2A-Puro vector (ABM Inc). The insert  
308 and the backbone were digested with NheI (NEB #R0131) and XhoI (NEB #R0146) restriction  
309 enzymes. Subsequent ligation with T4 DNA ligase created the pLenti-CD95L vector. The  
310 pLenti-CD95L<sup>MUT</sup> vector was created by sub-cloning a CD95L cDNA insert with 2 nucleotide  
311 substitutions in codon 218 (*TAT* -> *CGT*) resulting in replacement of tyrosine for arginine, which  
312 has been described to inhibit binding to CD95 (Schneider et al., 1997) into the pLenti-GIII-  
313 CMV-RFP-2A-Puro vector. The pLenti-CD95L<sup>MUT</sup>NP vector was created by inserting a CD95L  
314 ORF cDNA sequence containing both the Y218R mutation and a single nucleotide substitution at  
315 the second codon (*CAG* -> *TAG*), resulting in a premature stop codon right after the start codon,  
316 into the pLenti-GIII-CMV-RFP-2A-Puro vector. The pLenti-CD95L<sup>SIL</sup> was created by sub-  
317 cloning a mutant CD95L ORF cDNA sequence with codons synonymously mutated (**Figure 1 -**  
318 **figure supplement 2A**) to the next most highly utilized codon in human cells (exceptions were  
319 made within the proline rich domain to meet gene synthesis design criteria.) into the pLenti-GIII-  
320 CMV-RFP-2A-Puro vector.

321

### 322 **Overexpression of CD95L cDNAs**

323 All lentiviral constructs were generated in 293T cells as described previously (Putzbach et al.,  
324 2017). HeyA8 and MCF-7 (and all derivative cell lines) cells overexpressing wild type CD95L  
325 and mutant CD95L cDNAs were generated by seeding cells at 100,000 cells per well in a 6-well  
326 plate and infecting cells with lentivirus generated in 293T cells (500  $\mu$ l viral supernatant per  
327 well) with 8  $\mu$ g/ml Polybrene. Media was changed next day. Selection was started either during  
328 the evening of the same day or on following day with 3  $\mu$ g/ml puromycin. HCT116, HCT116  
329 Drosha knockout, and HCT116 Dicer knockout cells (Kim et al., 2016) overexpressing CD95L  
330 cDNAs were generated by seeding cells at 100,000 cells per well in a 24-well plate or 500,000  
331 cells per well in a 6-well plate and infecting cells with lentivirus generated in 293T cells (100  $\mu$ l  
332 virus per 24-well or 500  $\mu$ l per 6-well) in the presence of 8  $\mu$ g/ml Polybrene. Media was changed  
333 the next day, and cells were selected with 3  $\mu$ g/ml puromycin the following day. Infection with  
334 empty pLenti was always included as a control.

335 To assess toxicity of overexpressing CD95L cDNAs, cells infected with these constructs  
336 were plated in on a 96-well plate 1 day after selection in the presence of puromycin (uninfected  
337 cells were all dead after 1 day in presence of puromycin); Cell confluency was assessed over  
338 time using the IncuCyte as described previously (Putzbach et al., 2017).

339 To assess overexpression of CD95L cDNAs in apoptosis-sensitive HeyA8 cells in **Figure**  
340 **1A**, infection with CD95L lentiviruses were done in 96-well plate using 50  $\mu$ l of virus in the  
341 presence of 20  $\mu$ M zVAD-fmk (Sigma-Aldrich #V116) and 8  $\mu$ g/ml Polybrene; media was  
342 changed next day in the presence of 20  $\mu$ M zVAD-fmk; 3  $\mu$ g/ml puromycin was added the  
343 following day. Infection with the CD95L constructs for the RT-qPCR and Western blot in  
344 **Figure 1B** were done in a 6-well plate in the presence of 20  $\mu$ M zVAD-fmk.

345 For the experiment in **Figure 3B**, HeyA8 CD95 knock-out cells were reverse transfected  
346 in a 6-well plate; 100,000 cells were plated in wells with either the On-TargetPlus non-targeting  
347 siRNA (Dharmacon #D-001810-10) or siAGO2 pool (Dharmacon ##L-004639-00-0005) at 25  
348 nM complexed with 1  $\mu$ l RNAiMax. After ~24 hrs, the cells were infected with either pLenti or  
349 pLenti-CD95L (500  $\mu$ l of viral supernatant [25% of total volume]). Next day, media was  
350 replaced, and cells were expanded to 10 cm plates. The following day, 3  $\mu$ g/ml puromycin  
351 was added. When puromycin selection was complete (one day later), the 750-1,500 cells were  
352 plated per well in a 96-well plate and put in the IncuCyte machine to assess cell confluency over  
353 time.

354

## 355 **CRISPR deletions**

356 We co-transfected a Cas9-expressing plasmid (Jinek et al., 2013) and two gRNAs that target  
357 upstream and downstream to delete an entire section of DNA as described previously (Putzbach  
358 et al., 2017). The gRNA scaffold was used as described (Mali et al., 2013). The gRNAs were  
359 designed using the algorithm found at <http://crispr.mit.edu>; only gRNAs with a score above 50  
360 were considered.

361 A deletion of 227 nucleotides in exon 4 of CD95 in MCF-7 cells ( $\Delta$ shR6, clone #21) was  
362 generated using gRNAs described previously (Putzbach et al., 2017). Deletion of this site results  
363 in a frame-shift mutation that causes a protein-level knock-out (Putzbach et al., 2017). PCR with  
364 flanking external primers (Fr: 5'-GGTGTTCATGCTGTGACTGTTG-3' and Rev: 5'-  
365 TTTAGCTTAAGTGGCCAGCAA-3') and internal primers (Fr primer and the internal Rev primer  
366 5'-AAGTTGGTTTACATCTGCAC-3') was used to screen for single cell clones that harbor a  
367 homozygous deletion.

368 The two sequences targeted by the flanking gRNAs for the deletion of the entire CD95 gene  
369 were 5'-GTCAGGGTTCGTTGCACAAA-3' and 5'-TGCTTCTTGGATCCCTTAGA-3'. For  
370 detection of the CD95 gene deletion, the flanking external primers were 5'-  
371 TGTTAATATAGCTGGGGCTATGC-3' (Fr primer) and 5'-  
372 TGGGACTCATGGGTAAATAGAAT-3' (Rev primer), and the internal reverse primer was 5'-  
373 GACCAGTCTTCTCATTTCAGAGGT-3'. After screening the clones, Sanger sequencing was  
374 performed to confirm the proper deletion had occurred.

375

## 376 **Real-Time quantitative PCR**

377 The relative expression of specific mRNAs was quantified as described previously (Gao et al.,  
378 2018). The primer/probes purchased from ThermoFisher Scientific were GAPDH  
379 (Hs00266705\_g1), human CD95L (Hs00181226\_g1 and Hs00181225\_m1), human CD95  
380 (Hs00531110\_m1 and Hs00236330\_m1), and a custom primer/probe to detect the CD95L<sup>SIL</sup>  
381 mRNA (designed using the ThermoFisher Scientific custom design tool; assay ID: APNKTUD).

382 Custom RT-qPCR probes designed to specifically detect small RNA species were used to  
383 detect CD95L fragments in **Figure 4G**. These probes were designed using ThermoFisher's  
384 Custom TaqMan Small RNA Assay Design Tool ([https://www.thermofisher.com/order/custom-](https://www.thermofisher.com/order/custom-genomic-products/tools/small-rna/)  
385 [genomic-products/tools/small-rna/](https://www.thermofisher.com/order/custom-genomic-products/tools/small-rna/)) to target the cluster 8 sequence (5'-  
386 AAGGAGCTGGCAGAACTCCGAGA-3') and the cluster 21 sequence (5'-



387 TCAACGTATCTGAGCTCTCTC-3'). Detection of these fragments involves a two-step  
388 amplification protocol used to detect microRNAs. In the first step, the High-Capacity cDNA  
389 reverse transcription kit is used to selectively reverse transcribe the two clusters to be quantified  
390 using specific primers and 20 nM RNA input following the manufacturer's protocol. The cDNA  
391 is diluted 1:5. The qPCR reaction mixture is composed of the diluted cDNA, the custom probes,  
392 and the Taqman Universal PCR Master Mix (Applied Biosystems #43240018). Reactions were  
393 performed in triplicate. Ct values were determined using the Applied Biosystems 7500 Real  
394 Time PCR system with a thermocycle profile of 50°C for two min (step one), 95°C for 10 min  
395 (step two), and then 40 cycles of 95°C for 15 s (step three) and 60°C for 1 min (step four). The  
396  $\Delta\Delta C_t$  values between the small RNA of interest and the control were calculated to determine  
397 relative abundance of the small RNA. Samples were normalized to Z30 (ThermoFisher Scientific  
398 #4427975).

399

#### 400 **Western blot analysis**

401 Detection of human CD95, CD95L and Ago proteins was done via Western blot as described  
402 previously (Putzbach et al., 2017).

403

#### 404 **CD95 surface staining**

405 Flow cytometry was used to quantify the level of membrane-localized CD95 as described  
406 previously (Putzbach et al., 2017).

407

#### 408 **Cell death quantification (DNA fragmentation) and ROS production**

409 The percent of subG1 nuclei (fragmented DNA) was determined by PI staining/flow cytometry  
410 as described previously (Putzbach et al., 2017). ROS production was quantified using the cell-  
411 permeable indicator 2',7'-dichlorodihydrofluorescein diacetate (ThermoFisher Scientific #D399)  
412 as previously described (Hadji et al., 2014).

413

#### 414 **Assessing cell growth and fluorescence over time**

415 After treatment/infection, cells were seeded in a 96-well plate at least in triplicate. Images were  
416 captured at indicated time points using an IncuCyte ZOOM live cell imaging system (Essen  
417 BioScience) with a 10x objective lens. Percent confluence and total fluorescent integrated  
418 intensity was calculated using the IncuCyte ZOOM software (version 2015A).

419

### 420 **Infection of cells for Ago-pull down and small RNA-Seq analysis**

421 HeyA8  $\Delta$ shR6 clone #11 cells were seeded at 75,000 cells per well on 6-well plates, and the  
422 HCT116 and HCT116 Drosha knock-out cells were both seeded at 500,000 per well on 6-well  
423 plates. The HeyA8  $\Delta$ shR6 clone #11 cells were infected with 0.5 mL of empty pLenti or pLenti-  
424 CD95L-WT viral supernatant per well. The HCT116 and HCT116 Drosha knockout cells were  
425 infected with 0.5 mL empty pLenti or pLenti-CD95L<sup>MUT</sup>NP viral supernatant per well. Media  
426 was changed the next day and the cells were pooled and expanded to multiple 15 cm dishes.  
427 Selection with 3  $\mu$ g/mL puromycin began the following day. The next day, the HeyA8  $\Delta$ shR6  
428 clone #11 infected cells were seeded at 600,000 cells per dish in multiple 15 cm dishes; the  
429 HCT116 and HCT116 Drosha knock-out cells were seeded at 5 million cells per dish in multiple  
430 15 cm dishes. Two days later, each of the samples was pelleted and split in two: one pellet was  
431 lysed and processed for small RNA sequencing, and the other pellet was flash frozen in liquid  
432 nitrogen. The pellets were stored at -80°C until they could be used for the Ago pull-down  
433 experiment. The purpose of splitting the sample was so that we could compare the total cellular  
434 pool of small RNAs to the fraction that was bound to the RISC. This way, the processing  
435 CD95L-derived fragments from the full-length mRNA in the cytosol to the final mature RISC-  
436 bound form could be mapped. This was all done in duplicate.

437

### 438 **RNA-Seq analysis**

439 Total RNA was isolated using the miRNeasy Mini Kit (Qiagen, #74004) following the  
440 manufacturer's instructions. An on-column digestion step using the RNase-free DNase Set  
441 (Qiagen #79254) was included. Both small and large mRNA libraries were generated and  
442 sequenced as described previously (Putzbach et al., 2017). Reads were trimmed with TrimGalore  
443 and then aligned to the hg38 assembly of the human genome with Tophat. Raw read counts were  
444 assigned to genes using HTSeq and differential gene expression was analyzed with the R  
445 Bioconductor EdgeR package (Robinson, McCarthy, & Smyth, 2010).

446

### 447 **Ago pull down and RNA-Seq analysis of bound small RNAs**

448 Cell pellets were harvest at 50 hours after plating (122 hours after infection) and were flash  
449 frozen in liquid nitrogen. The pellets were stored at -80°C until ready for further processing.  
450 Between 10 and 25 x 10<sup>6</sup> cells were lysed in NP40 lysis buffer (20 mM Tris, pH 7.5, 150 mM

451 NaCl, 2 mM EDTA, 1% (v/v) NP40, supplemented with phosphatase inhibitors) on ice for 15  
452 minutes. The lysate was sonicated 3 times for 30 s at 60% amplitude (Sonics, VCX130) and  
453 cleared by centrifugation at 12,000g for 20 minutes. AGO1-4 were pulled down by using 500 µg  
454 of Flag-GST-T6B peptide (Hauptmann et al., 2015) and with 60 µl anti-Flag M2 magnetic beads  
455 (Sigma-Aldrich) for 2 hrs at 4°C. The pull-down was washed 3 times in NP40 lysis buffer.  
456 During the last wash, 10% of beads were removed and incubated at 95°C for 5 minutes in 2x  
457 SDS-PAGE sample buffer. Samples were run on a 4-12% SDS-PAGE and transferred to  
458 nitrocellulose membrane. The pull-down efficiency was determined by immunoblotting against  
459 AGO1 (Cell Signaling #5053; RRID:AB\_10695871 and Abcam #98056; RRID:AB\_10680548)  
460 and AGO2 (Abcam #32381; RRID:AB\_867543). To the remaining beads 500 µl TRIzol reagent  
461 were added and the RNA extracted according to the manufacturer's instructions. The RNA pellet  
462 was diluted in 20 µl of water. The sample was split, and half of the sample was dephosphorylated  
463 with 0.5 U/µl of CIP alkaline phosphatase at 37°C for 15 min and subsequently radiolabeled with  
464 0.5 µCi  $\gamma$ -<sup>32</sup>P-ATP and 1 U/µl of T4 PNK kinase for 20 min at 37°C. The AGO1-4 interacting  
465 RNAs were visualized on a 15% urea-PAGE. The remaining RNA was taken through a small  
466 RNA library preparation as previously described (Hafner et al., 2012). Briefly, RNA was ligated  
467 with 3' adenylated adapters and separated on a 15% denaturing urea-PAGE. The RNA  
468 corresponding to insert size of 19-35 nt was eluted from the gel, ethanol precipitated followed by  
469 5' adapter ligation. The samples were separated on a 12% Urea-PAGE and extracted from the  
470 gel. Reverse transcription was performed using Superscript III reverse transcriptase and the  
471 cDNA amplified by PCR. The cDNA was sequenced on Illumina HiSeq 3000. Adapter  
472 sequences: Adapter 1 – NNTGACTGTGGAATTCTCGGGTGCCAAGG; Adapter 2 –  
473 NNACACTCTGGAATTCTCGGGTGCCAAGG, Adapter 3 –  
474 NNACAGAGTGGAATTCTCGGGTGCCAAGG, Adapter 4 –  
475 NNGCGATATGGAATTCTCGGGTGCCAAGG, Adapter 47 –  
476 NNTCTGTGTGGAATTCTCGGGTGCCAAGG, Adapter 48 –  
477 NNCAGCATTGGAATTCTCGGGTGCCAAGG, Adapter 49 –  
478 NNATAGTATGGAATTCTCGGGTGCCAAGG, Adapter 50 –  
479 NNTCATAGTGGAATTCTCGGGTGCCAAGG. RT primer sequence:  
480 GCCTTGGCACCCGAGAATTCCA; PCR primer sequences:  
481 CAAGCAGAAGACGGCATAACGAGATCGTGATGTGACTGGAGTTCCTTGGCACCCGAG  
482 AATTCCA. To identify CD95L-derived small RNAs among the sequenced reads, a BLAST

483 database was generated from each set of reads, and blastn was used to query the CD95L ORF  
484 (derived from NM\_000639.2) against reads from cells infected with pLenti-CD95L and to query  
485 the CD95L<sup>MUT</sup>NP ORF sequence against reads from cells infected with CD95L<sup>MUT</sup>NP. The only  
486 reads considered further were those matching a CD95L sequence with an e-value of less than  
487 0.05 and 100% identity across the entire length of the read. This resulted in the loss of a few  
488 reads less than 19/20 nt in length. The filtered BLAST hits were converted to a bed formatted  
489 file, describing the locations of reads relative to the relevant CD95L sequence, and the R  
490 package Sushi was used to plot the bed files and generate Figures 4B-E.

491

### 492 **Assessing toxicity of CD95L-derived small RNAs**

493 To determine whether guide RNAs derived from the over-expressed CD95L mRNA could evoke  
494 toxicity, the small CD95L-derived RNA reads (corresponding to different clusters shown in  
495 **Figure 4C**) bound to AGO from the HCT116 Droscha knock-out cells were converted to siRNAs.  
496 First, all reads less than 18 nucleotides were filtered out, as these do not efficiently incorporate  
497 into the RISC. siRNAs were designed with antisense strands identical to these CD95L-derived  
498 sequences that mapped to areas of the CD95L mRNA secondary structure (**Figure 4 - figure**  
499 **supplement 1A**) that are predicted to form duplexes. These sequences were designed as 19  
500 nucleotide oligos with a 3' deoxy AA. The complementary sense strand was designed with a 3'  
501 deoxy TT and 2'-O-methylation at the first two positions to prevent its incorporation into the  
502 RISC. These oligos were ordered from IDT and annealed to form the final siRNAs. The  
503 sequences of the antisense strands (corresponding to the CD95L mRNA-derived cluster  
504 fragments) were as follows: 5'-AUUGGGCCUGGGGAUGUUU-3' (c7/1), 5'-  
505 CCUGGGGAUGUUUCAGCUC-3' (c7/2), 5'-CCAACUCAAGGUCCAUGCC-3' (c11), 5'-  
506 AAACUGGGCUGUACUUUGU-3' (c15/1), 5'- AACUGGGCUGUACUUUGUA-3' (c15/2),  
507 5'- CAACAACCUGCCCCUGAGC-3' (c16/1), 5'- AACUCUAAGCGUCCCCAGG-3' (c16/2),  
508 5'- UCAACGUAUCUGAGCUCUC-3' (c21), and 5'- AAUCUCAGACGUUUUUCGG-3'  
509 (c22).

510 These eight siRNAs were reverse transfected into HeyA8, H460, M565, and 3LL cells using  
511 RNAiMAX transfection reagent (ThermoFisher Scientific) at 10 nM in triplicate as previously  
512 described (Murmans et al., 2018). The non-targeting (NT) and siL3 siRNAs, as described  
513 previously (Putzbach et al., 2017), were used as a negative and positive control, respectively.  
514 Cell death was quantified via ATP release 96 hours after transfection using CellTiter-Glo

515 (Promega). The % viability was calculated in relation to the RNAiMAX-only treatment  
516 structure (*Figure 4 - figure supplement 1B*).

517

### 518 **Statistical analyses**

519 Continuous data were summarized as means and standard deviations (except for all IncuCyte  
520 experiments where standard errors are shown) and dichotomous data as proportions. Continuous  
521 data were compared using t-tests for two independent groups and one-way ANOVA for 3 or  
522 more groups. For evaluation of continuous outcomes over time, two-way ANOVA was used with  
523 one factor for the treatment conditions of primary interest and a second factor for time treated as  
524 a categorical variable to allow for non-linearity.

525 The effects of treatment on wild-type versus Drosha knock-out cells were statistically  
526 assessed by fitting regression models that included linear and quadratic terms for value over  
527 time, main effects for treatment and cell type, and two- and three-way interactions for treatment,  
528 cell-type and time. The three-way interaction on the polynomial terms with treatment and cell  
529 type was evaluated for statistical significance since this represents the difference in treatment  
530 effects over the course of the experiment for the varying cell types.

531 GSEA used in *Figure 2B* was performed using the GSEA v2.2.4 software from the Broad  
532 Institute ([www.http://software.broadinstitute.org/gsea](http://software.broadinstitute.org/gsea)); 1000 permutations were used. The  
533 Sabatini gene lists were set as custom gene sets to determine enrichment of survival genes versus  
534 the nonsurvival control genes in downregulated genes from the RNA-Seq data as done  
535 previously (Putzbach et al., 2017); p-values below 0.05 were considered significantly enriched.  
536 Genes with an average normalized read expression (across both pair of duplicates) below 3 were  
537 excluded so as to only include genes that are truly expressed. The GO enrichment analysis shown  
538 in *Figure 2D* was performed with all genes that after alignment and normalization were found to  
539 be at least 1.5 fold downregulated with an adjusted p-value of <0.05 using the software available  
540 on [www.Metascape.org](http://www.Metascape.org) and default running parameters. The other data sets used in this analysis  
541 (HeyA8 cells transfected with a toxic siRNA targeting CD95L siL3 and 293T infected with toxic  
542 shRNAs targeting CD95L shL1 and shL3 and HeyA8 cells infected with a toxic shRNA  
543 targeting CD95 shR6) were previously described (Putzbach et al., 2017).

544 All statistical analyses were conducted in Stata 14 or R 3.3.1.

545

### 546 **Data availability**

547 RNA sequencing data generated for this study is available in the GEO repository: GSE103631  
548 (<https://www.ncbi.nlm.nih.gov/geo/query/acc.cgi?acc=GSE103631>, reviewer access token:  
549 etgbqyaenvirjqn) and GSE114425  
550 (<https://www.ncbi.nlm.nih.gov/geo/query/acc.cgi?acc=GSE114425>, reviewer access token:  
551 edgdoaocjberbyr).  
552

553 **Acknowledgements**

554 We are grateful to Siquan Chen for testing small CD95L-derived siRNAs. M.H. and A.A.S were  
555 supported by the Intramural Research Program of NIAMS. A.A.S. acknowledges support by the  
556 Swedish Research Council postdoctoral fellowship. This work was funded by training grant  
557 T32CA009560 (to W.P. and A.H.K.), R50CA221848 (to E.T.B.), and R35CA197450 (to  
558 M.E.P.).

559

560 **Author contributions**

561 W.P. planned the study and performed experiments. A.H.K., Q.Q.G., A.S.Q., and A.S.  
562 performed experiments, D.M.S. provided biostatistics support, E.B. provided biocomputational  
563 support, A.A.S. performed the Ago pull down experiments, M.H. provided assistance and  
564 discussions on the mechanism of RNAi and the RISC, and M.E.P. directed the study and M.E.P.  
565 and W.P. wrote the manuscript.

566

567 **Competing financial interests**

568 The authors declare no competing financial interests.

569



570 **Figure legends**

571

572 **Figure 1.**

573 **The CD95L RNA is toxic to cells.**

574 (A) *Left*: Schematic of the different CD95L mutants used. *Right*: Percent cell confluence over  
575 time of HeyA8 parental cells in the absence (*left panel*) or in the presence of 20  $\mu$ M zVAD-fmk  
576 (*center panel*), or CD95 k.o. cells (*right panel*) after expression of CD95L constructs. Data are  
577 representative of one to three independent experiments. Values were calculated from samples  
578 done in triplicate or quadruplicate shown as mean  $\pm$  SE. (B) *Left*: Western blot analysis of  
579 HeyA8 cells overexpressing different CD95L mutant RNAs. Cells expressing CD95L<sup>MUT</sup> or  
580 CD95L were pretreated with 20  $\mu$ M zVAD-fmk. Note the small amount of truncated CD95L in  
581 cells infected with CD95L MUT-NP does not have CD95 binding activity. Very similar data  
582 were obtained when the constructs were expressed in either CD95 k.o. HeyA8 cells (clone #11)  
583 or NB 7 cells, both without treatment with zVAD (data not shown). *Right*: RT-qPCR analysis for  
584 CD95L of the same samples. Data are representative of two independent experiments. Each bar  
585 represents mean  $\pm$  S.D. of three replicates. (C, D) Quantification of cell death (C) and ROS  
586 production (D) in cells expressing either pLenti (v) or pLenti-CD95L (L) at different time points  
587 (days after infection). Data are representative of two independent experiments. Each bar  
588 represents mean  $\pm$  SE of three replicates. \*  $p < 0.05$ , \*\*  $p < 0.001$ , \*\*\*  $p < 0.0001$ , unpaired t-test.  
589 (E) Confluency over time of the MCF-7 complete CD95 k.o. FA4 clone (right) or a MCF-7 clone  
590 #21 in which we deleted the shR6 site resulting in an out-of-frame shift after infection with either  
591 vector control or wt CD95L. Data are representative of two independent experiments. Each data  
592 point represents mean  $\pm$  SE of three replicates.

593

594 **Figure 1 - figure supplement 1.**

595 **Generation of complete CD95 k.o. MCF-7 cells.**

596 (A) Schematic of the genomic locations and sequences of the gRNAs used to excise the entire  
597 CD95 gene in MCF-7 cells. PAM site is underlined. (B) PCR with flanking (*top panels*) and  
598 internal (*bottom panels*) primers used to confirm the absence of the CD95 gene in MCF-7 clones.  
599 Parental (Par.) cells and three clones infected with Cas9 only (Cas9) and two complete k.o.  
600 clones (F2 and FA4) are shown. (C) RT-qPCR analysis of the indicated clones using primers  
601 spanning either exon 1/2 or exon 2/3 of the CD95 gene. (D) Surface staining for CD95 of one wt  
602 and one k.o. clone. (E) Western blot analysis of all clones.

603

604 **Figure 1 - figure supplement 2.**

605 **Toxicity of CD95L mRNA is independent of CD95L protein expression.**

606 (A) Schematic showing the positions of the silent mutation of the CD95L<sup>SIL</sup> compared to wild  
607 type CD95L. (B) Percent cell confluence over time of HeyA8 CD95 k.o. cells over-expressing  
608 empty pLenti, wild-type CD95L (from two separately cloned viruses), or the CD95L<sup>SIL</sup>. (C) RT-  
609 qPCR analysis and Western blot (*inset*) of wild type CD95L and CD95L<sup>SIL</sup> mutant mRNAs in the  
610 over-expressing cells shown in B.

611

612 **Figure 2.**

613 **Toxicity induced by CD95L overexpression is reminiscent of DISE.**

614 (A) Phase-contrast images of HeyA8 and HeyA8 CD95 k.o. cells after infection with pLKO-  
615 shScr/shL3 or pLenti/pLenti-CD95L, respectively, at the indicated time point. (B) Gene set  
616 enrichment analysis for the 1846 survival genes (*top panel*) and the 416 nonsurvival genes  
617 (*bottom panel*) identified in the Sabatini study (Putzbach et al., 2017; Wang et al., 2015) of

618 mRNAs downregulated in CD95L expressing HeyA8 CD95 k.o. cells compared to HeyA8  
619 CD95 k.o. cells infected with pLenti virus. p-values indicate the significance of enrichment. (C)  
620 The genes downregulated in all cells including the ones downregulated following introduction of  
621 one of four si/shRNAs (Putzbach et al., 2017) derived from either CD95 or CD95L (see **Figure**  
622 **2D**) and the ones overexpressing CD95L ORF as described in **B**. (D) Metascape analysis of 5  
623 RNA Seq data sets analyzed. The boxed GO term clusters were highly enriched in all 5 data sets.

624

### 625 **Figure 3.**

#### 626 **Small RNAs generated in cells expressing CD95L mRNA are loaded into the RISC.**

627 (A) Percent cell confluence over time of HCT116 parental (*left*) or Drosha k.o. (*right*) cells after  
628 infection with CD95<sup>MUT</sup>NP. Data are representative of three independent experiments. Each data  
629 point represents the mean  $\pm$  SE of three replicates. *Inset*: Phase contrast images of Drosha k.o.  
630 cells 9 days after infection with either empty vector or CD95L<sup>MUT</sup>NP. (B) Percent cell  
631 confluence of HeyA8 CD95 k.o. cells transfected with either non-targeting siRNA (siCtr) or a  
632 pool of 4 siRNAs targeting AGO2 following subsequent infection with either empty pLenti (EV)  
633 or pLenti CD95L. *Inset*: Western blot showing successful knock-down of human AGO2. (C)  
634 *Top*: autoradiograph on RNAs pulled down with the Ago binding peptide. *Bottom*: Western blot  
635 analysis of pulled down Ago proteins. v, pLenti; L, pLenti-CD95L expressing cells. (D) Pie  
636 charts showing the relative ratio of small RNAs pulled down with the Ago proteins in wt and  
637 Drosha k.o. cells. Depicted are all the amounts of all small RNAs that contributed at least 0.01%  
638 to the total RNA content. Only in the Drosha k.o. cells was a significant amount of CD95L  
639 derived Ago bound reads found. They represented the 75th most abundant small RNA species  
640 (arrow). The average number of total sequenced reads (of two duplicates) are shown for each  
641 condition. (E) *Top*: Number of reads (normalized per million) of the top six most abundant small  
642 RNAs in the RISC of either HCT116 wt-pLenti or -pLenti-CD95L cells. *Bottom*: Number of  
643 reads (per million) of the top five genes with small RNAs most abundant in the RISC of either  
644 HCT116 Drosha k.o. pLenti, or -pLenti-CD95L cells and of CD95L derived. Note: miR-21 is not  
645 included as it is already shown in the top row. Bottom right panel: Abundance of Ago bound  
646 CD95L derived small RNAs. Shown in all panels is the abundance of RNAs in the four samples.  
647 Rep 1 and rep 2, replicate 1 and 2.

648

### 649 **Figure 4**

#### 650 **The entire CD95L mRNA gives rise to small RNAs that bind to the RISC.**

651 (A) Length distribution of CD95L derived reads in various analyses. (B, C) Read alignment with  
652 CD95L<sup>MUT</sup>NP ORF of analyses of small RNAs pulled down with Ago proteins from HCT116 wt  
653 (B, top) and Drosha k.o. (B, bottom) cells and of total small RNAs from HCT116 Drosha k.o.  
654 cells (C) after infection with CD95L<sup>MUT</sup>NP. (D, E) Read alignment with wt CD95L ORF of  
655 analyses of small RNAs pulled down with Ago proteins (D) or total small RNAs (E) from  
656 HeyA8 CD95 k.o. cells after infection with wt CD95L. (F) Percent cell confluence over time of  
657 HCT116 parental (*top*) or Dicer k.o. (clone #43) (*bottom*) cells after infection with CD95<sup>MUT</sup>NP.  
658 (Dicer k.o. clone #45, gave a similar result, data not shown). Data are representative of two  
659 independent experiments. Each data point represents the mean  $\pm$  SE of three replicates. (G) RT-  
660 qPCR analysis of clusters 8 and 21 in HCT116 parental, Dicer k.o. (clone #43), and Drosha k.o.  
661 cells after infection with CD95<sup>MUT</sup>NP. Each bar represents mean  $\pm$  S.D. of three replicates. v,  
662 vector, L, CD95L expressing cells.

663

### 664 **Figure 4 - figure supplement 1**

665 **Predicted secondary structure of CD95L ORF and toxicity of CD95L-derived small**  
666 **RNAs after conversion to siRNAs.**

667 (A) The CD95L<sup>MUT</sup>NP RNA was subjected to a RNA secondary structure analysis  
668 (<http://rna.tbi.univie.ac.at>) using default settings. The locations of 22 reads representative of the  
669 22 read clusters are shown. Regions with potential duplex formation are boxed. The  
670 oligonucleotides that were found to be toxic when expressed as siRNAs are circled. (B) Toxicity  
671 of the eight siRNAs designed using the CD95L-derived small RNA fragments bound to Ago as  
672 the antisense strand sequences 96 hours post-transfection in the indicated cell lines. Each data  
673 point represents the mean  $\pm$  SE of three replicates.

674

675

676

677 **Supplementary Videos:**

678

679 **Video 1: CD95 k.o. HeyA8 cells (clone 11) infected with pLenti control virus.**

680

681 **Video 2: CD95 k.o. HeyA8 cells (clone 11) infected with pLenti-CD95Lvirus.**

682

683 **Video 3: HeyA8 cells infected with pLKO-shScr.**

684

685 **Video 4: HeyA8 cells infected with pLKO-shL3.**

686

687 **References**

- 688
- 689 Algeciras-Schimnich, A., Shen, L., Barnhart, B. C., Murmann, A. E., Burkhardt, J. K., & Peter,  
690 M. E. (2002). Molecular ordering of the initial signaling events of CD95. *Mol Cell Biol*,  
691 22(1), 207-220.
- 692 Ceppi, P., Hadji, A., Kohlhapp, F., Pattanayak, A., Hau, A., Xia, L., . . . Peter, M. E. (2014).  
693 CD95 and CD95L promote and protect cancer stem cells. *Nature Commun*, 5, 5238.
- 694 Elkayam, E., Faehnle, C. R., Morales, M., Sun, J., Li, H., & Joshua-Tor, L. (2017). Multivalent  
695 Recruitment of Human Argonaute by GW182. *Mol Cell*, 67(4), 646-658 e643.  
696 doi:10.1016/j.molcel.2017.07.007
- 697 ElOjeimy, S., McKillop, J. C., El-Zawahry, A. M., Holman, D. H., Liu, X., Schwartz, D. A., . . .  
698 Norris, J. S. (2006). FasL gene therapy: a new therapeutic modality for head and neck  
699 cancer. *Cancer gene therapy*, 13(8), 739-745. doi:10.1038/sj.cgt.7700951
- 700 Friesen, C., Fulda, S., & Debatin, K. M. (1999). Cytotoxic drugs and the CD95 pathway.  
701 *Leukemia*, 13(11), 1854-1858.
- 702 Fu, Q., Fu, T. M., Cruz, A. C., Sengupta, P., Thomas, S. K., Wang, S., . . . Chou, J. J. (2016).  
703 Structural Basis and Functional Role of Intramembrane Trimerization of the Fas/CD95  
704 Death Receptor. *Mol Cell*, 61(4), 602-613. doi:10.1016/j.molcel.2016.01.009
- 705 Gao, Q. Q., Putzbach, W., Murmann, A. E., Chen, S., Ambrosini, G., Peter, J. M., . . . Peter, M.  
706 E. (2018). 6mer Seed Toxicity Determines Strand Selection in miRNAs. *BioRxiv*.  
707 doi:<https://doi.org/10.1101/284406>
- 708 Hadji, A., Ceppi, P., Murmann, A. E., Brockway, S., Pattanayak, A., Bhinder, B., . . . Peter, M.  
709 E. (2014). Death induced by CD95 or CD95 ligand elimination. *Cell Reports*, 10, 208-  
710 222.
- 711 Hafner, M., Renwick, N., Farazi, T. A., Mihailovic, A., Pena, J. T., & Tuschl, T. (2012).  
712 Barcoded cDNA library preparation for small RNA profiling by next-generation  
713 sequencing. *Methods*, 58(2), 164-170. doi:10.1016/j.ymeth.2012.07.030
- 714 Hamilton, A. J., & Baulcombe, D. C. (1999). A species of small antisense RNA in  
715 posttranscriptional gene silencing in plants. *Science*, 286(5441), 950-952.
- 716 Hansen, T. B., Veno, M. T., Jensen, T. I., Schaefer, A., Damgaard, C. K., & Kjems, J. (2016).  
717 Argonaute-associated short introns are a novel class of gene regulators. *Nature*  
718 *communications*, 7, 11538. doi:10.1038/ncomms11538
- 719 Hauptmann, J., Schraivogel, D., Bruckmann, A., Manickavel, S., Jakob, L., Eichner, N., . . .  
720 Meister, G. (2015). Biochemical isolation of Argonaute protein complexes by Ago-APP.  
721 *Proc Natl Acad Sci U S A*, 112(38), 11841-11845. doi:10.1073/pnas.1506116112
- 722 Hyer, M. L., Voelkel-Johnson, C., Rubinchik, S., Dong, J., & Norris, J. S. (2000). Intracellular  
723 Fas ligand expression causes Fas-mediated apoptosis in human prostate cancer cells  
724 resistant to monoclonal antibody-induced apoptosis. *Mol Ther*, 2(4), 348-358.
- 725 Kim, Y. K., Kim, B., & Kim, V. N. (2016). Re-evaluation of the roles of DROSHA, Export in 5,  
726 and DICER in microRNA biogenesis. *Proc Natl Acad Sci U S A*, 113(13), E1881-1889.  
727 doi:10.1073/pnas.1602532113
- 728 Liu, J., Carmell, M. A., Rivas, F. V., Marsden, C. G., Thomson, J. M., Song, J. J., . . . Hannon,  
729 G. J. (2004). Argonaute2 is the catalytic engine of mammalian RNAi. *Science*,  
730 305(5689), 1437-1441.
- 731 Mali, P., Yang, L., Esvelt, K. M., Aach, J., Guell, M., DiCarlo, J. E., . . . Church, G. M. (2013).  
732 RNA-guided human genome engineering via Cas9. *Science*, 339(6121), 823-826.  
733 doi:10.1126/science.1232033

- 734 Murmann, A. E., Gao, Q. Q., Putzbach, W. E., Patel, M., Bartom, E. T., Law, C. Y., . . . Peter,  
735 M. E. (2018). Small interfering RNAs based on huntingtin trinucleotide repeats are  
736 highly toxic to cancer cells. *EMBO Rep*, *19*(3). doi:10.15252/embr.201745336
- 737 Nisihara, T., Ushio, Y., Higuchi, H., Kayagaki, N., Yamaguchi, N., Soejima, K., . . . Yagita, H.  
738 (2001). Humanization and epitope mapping of neutralizing anti-human Fas ligand  
739 monoclonal antibodies: structural insights into Fas/Fas ligand interaction. *J Immunol*,  
740 *167*(6), 3266-3275.
- 741 Patel, M., & Peter, M. E. (2017). Identification of DISE-inducing shRNAs by monitoring cellular  
742 responses. *Cell Cycle*, *0*. doi:10.1080/15384101.2017.1383576
- 743 Putzbach, W., Gao, Q. Q., Patel, M., Haluck-Kangas, A., Murmann, A. E., & Peter, M. E.  
744 (2018). DISE - A Seed Dependent RNAi Off-Target Effect that Kills Cancer Cells.  
745 *Trends in Cancer*, *4*, 10-19.
- 746 Putzbach, W., Gao, Q. Q., Patel, M., van Dongen, S., Haluck-Kangas, A., Sarshad, A. A., . . .  
747 Peter, M. E. (2017). Many si/shRNAs can kill cancer cells by targeting multiple survival  
748 genes through an off-target mechanism. *Elife*, *6*, e29702.
- 749 Robinson, M. D., McCarthy, D. J., & Smyth, G. K. (2010). edgeR: a Bioconductor package for  
750 differential expression analysis of digital gene expression data. *Bioinformatics*, *26*(1),  
751 139-140. doi:10.1093/bioinformatics/btp616
- 752 Schneider, P., Bodmer, J. L., Holler, N., Mattmann, C., Scuderi, P., Terskikh, A., . . . Tschopp, J.  
753 (1997). Characterization of Fas (Apo-1, CD95)-Fas ligand interaction. *J Biol Chem*,  
754 *272*(30), 18827-18833.
- 755 Suda, T., Takahashi, T., Golstein, P., & Nagata, S. (1993). Molecular cloning and expression of  
756 the Fas ligand, a novel member of the tumor necrosis factor family. *Cell*, *75*(6), 1169-  
757 1178.
- 758 Sudarshan, S., Holman, D. H., Hyer, M. L., Voelkel-Johnson, C., Dong, J. Y., & Norris, J. S.  
759 (2005). In vitro efficacy of Fas ligand gene therapy for the treatment of bladder cancer.  
760 *Cancer gene therapy*, *12*(1), 12-18. doi:10.1038/sj.cgt.7700746
- 761 Sun, H., Liu, Y., Bu, D., Liu, X., Norris, J. S., & Xiao, S. (2012). Efficient growth suppression  
762 and apoptosis in human laryngeal carcinoma cell line HEP-2 induced by an adeno-  
763 associated virus expressing human FAS ligand. *Head Neck*, *34*(11), 1628-1633.  
764 doi:10.1002/hed.21985
- 765 Wang, T., Birsoy, K., Hughes, N. W., Krupczak, K. M., Post, Y., Wei, J. J., . . . Sabatini, D. M.  
766 (2015). Identification and characterization of essential genes in the human genome.  
767 *Science*, *350*(6264), 1096-1101. doi:10.1126/science.aac7041
- 768 Yoda, M., Cifuentes, D., Izumi, N., Sakaguchi, Y., Suzuki, T., Giraldez, A. J., & Tomari, Y.  
769 (2013). Poly(A)-specific ribonuclease mediates 3'-end trimming of Argonaute2-cleaved  
770 precursor microRNAs. *Cell Rep*, *5*(3), 715-726. doi:10.1016/j.celrep.2013.09.029  
771

Figure 1

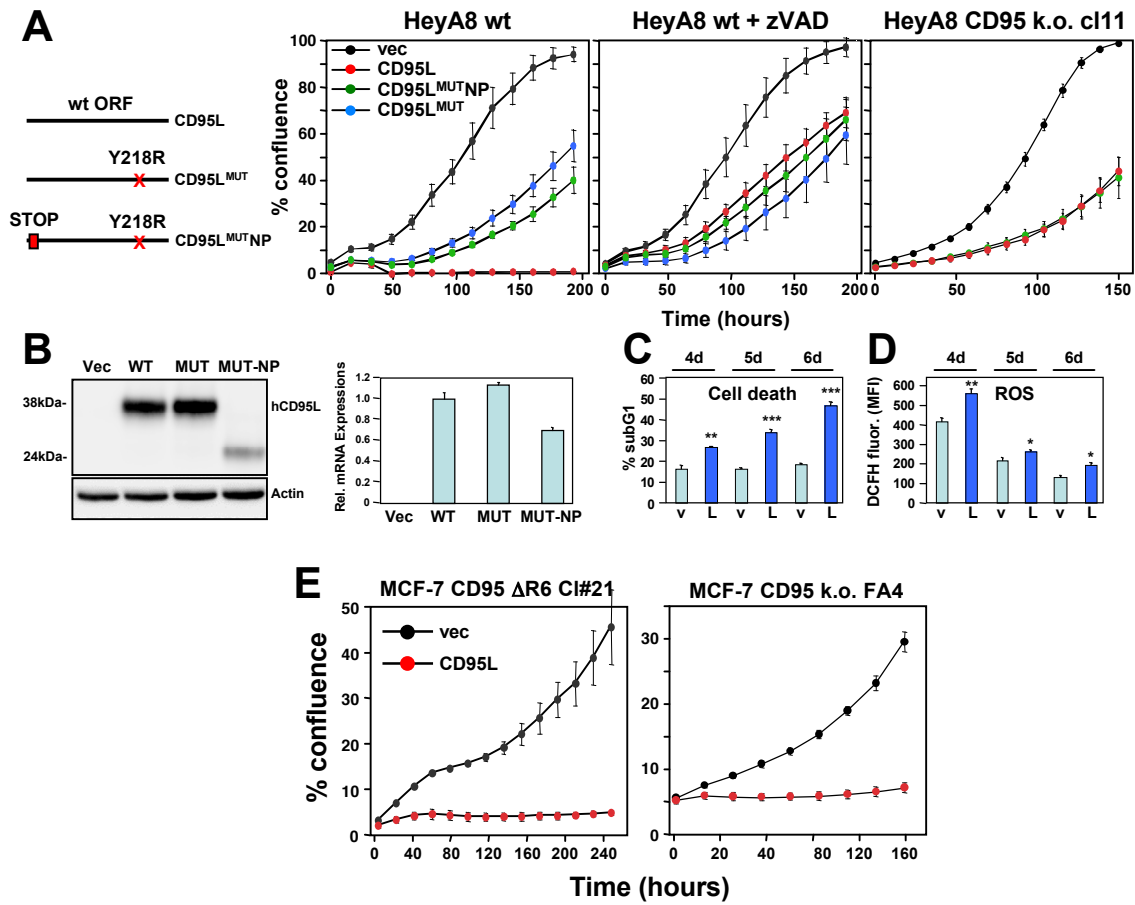



Figure 1 - figure supplement 1

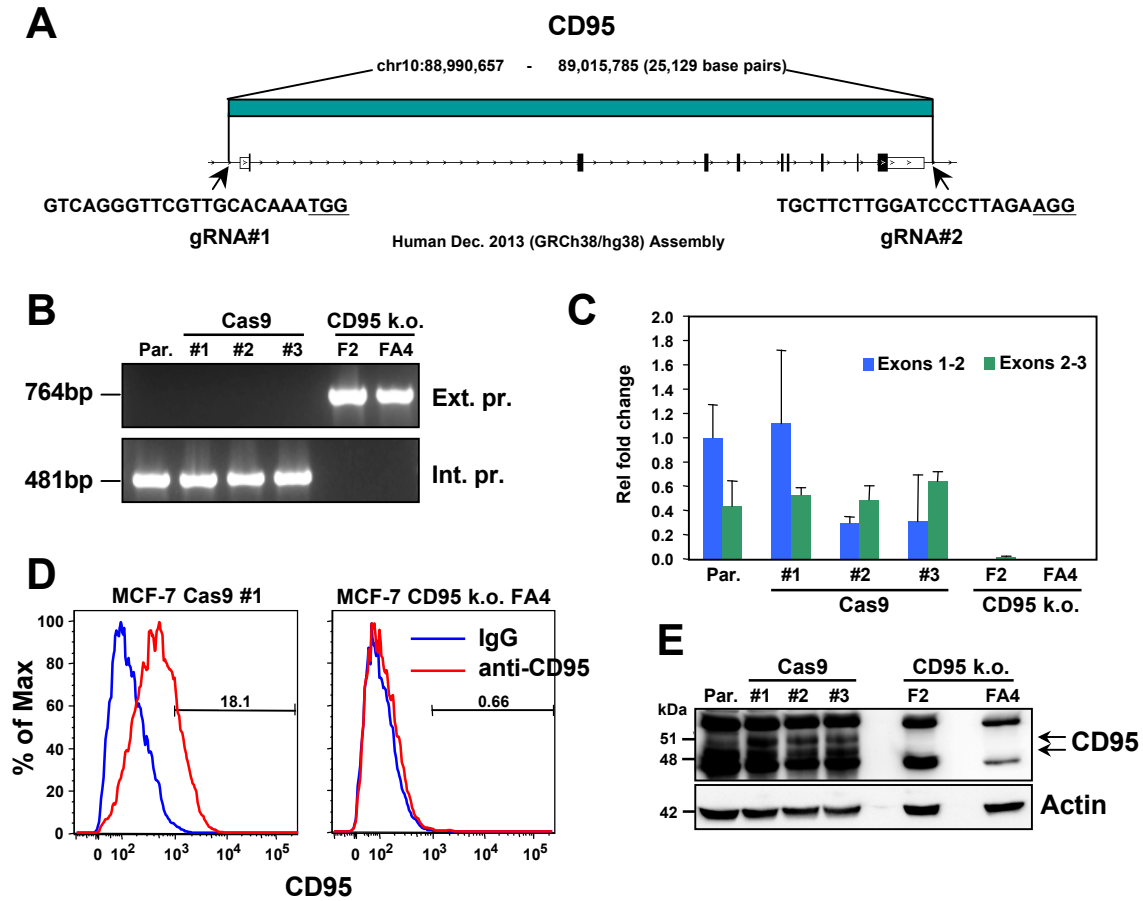



Figure 1 - figure supplement 2

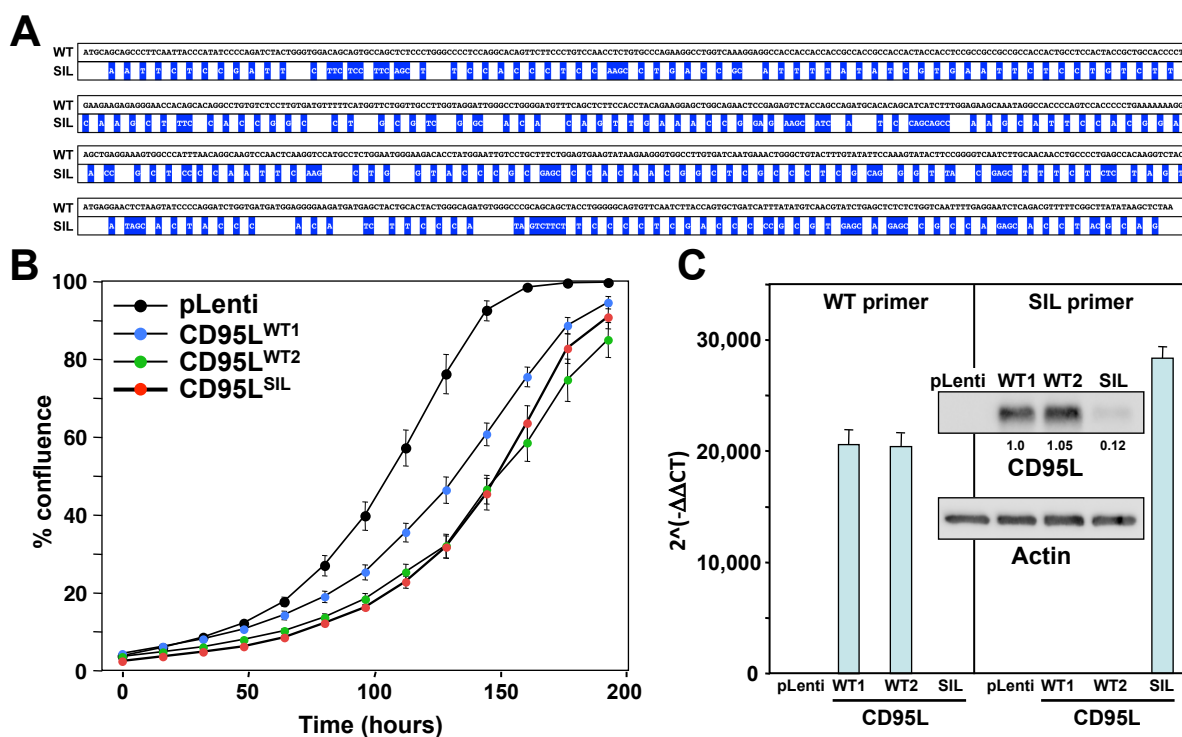

Figure 2

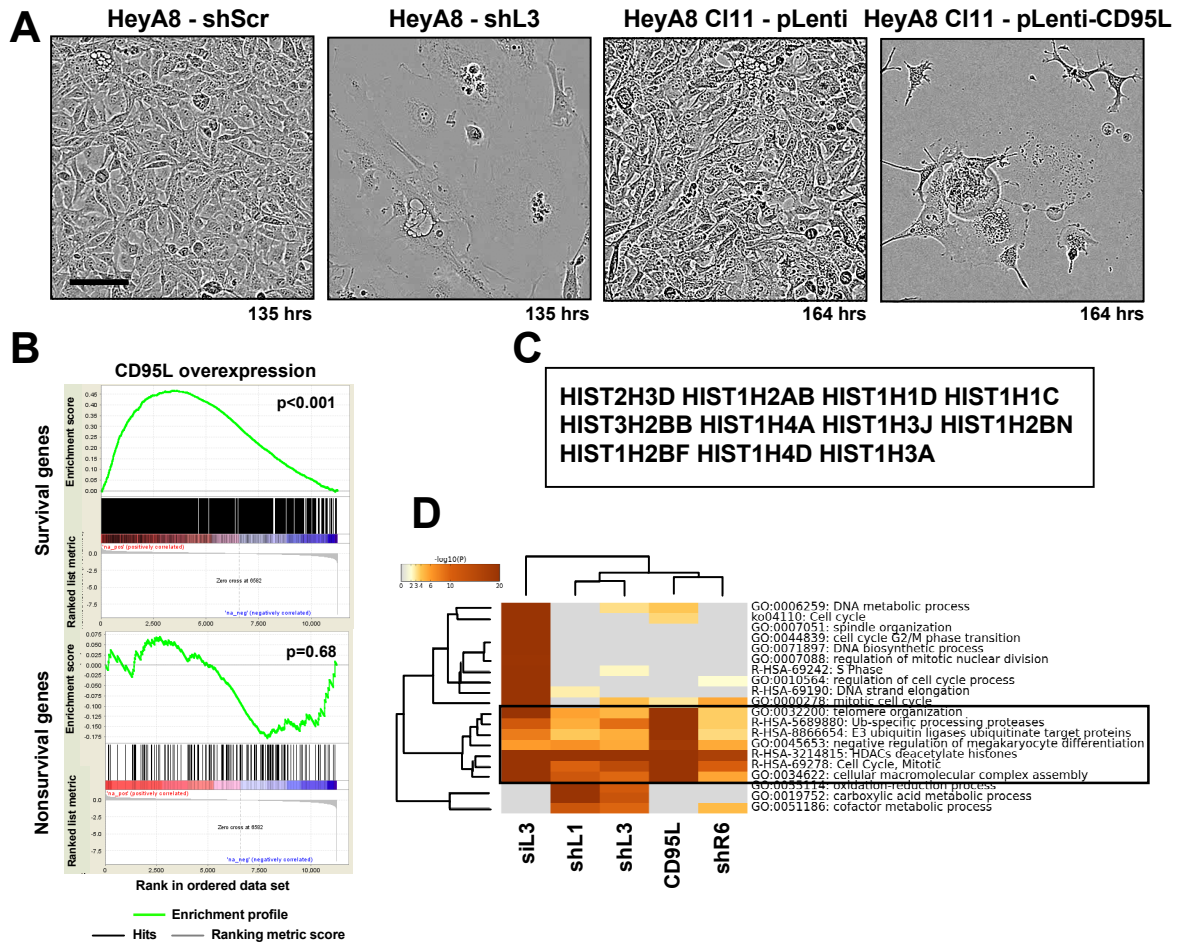

Figure 3

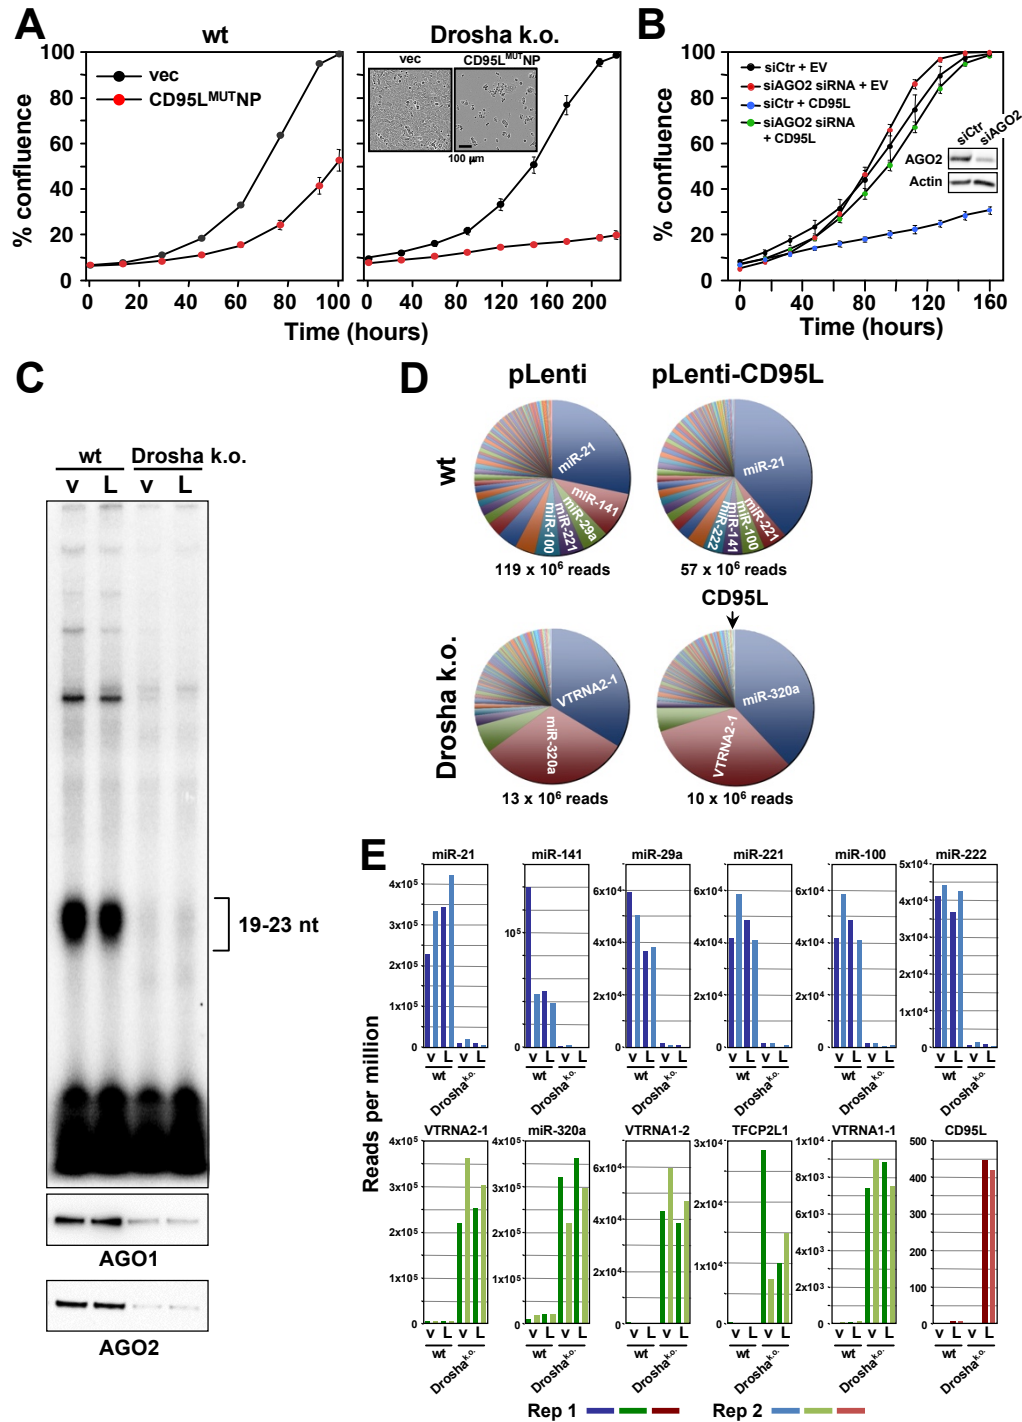

Figure 4

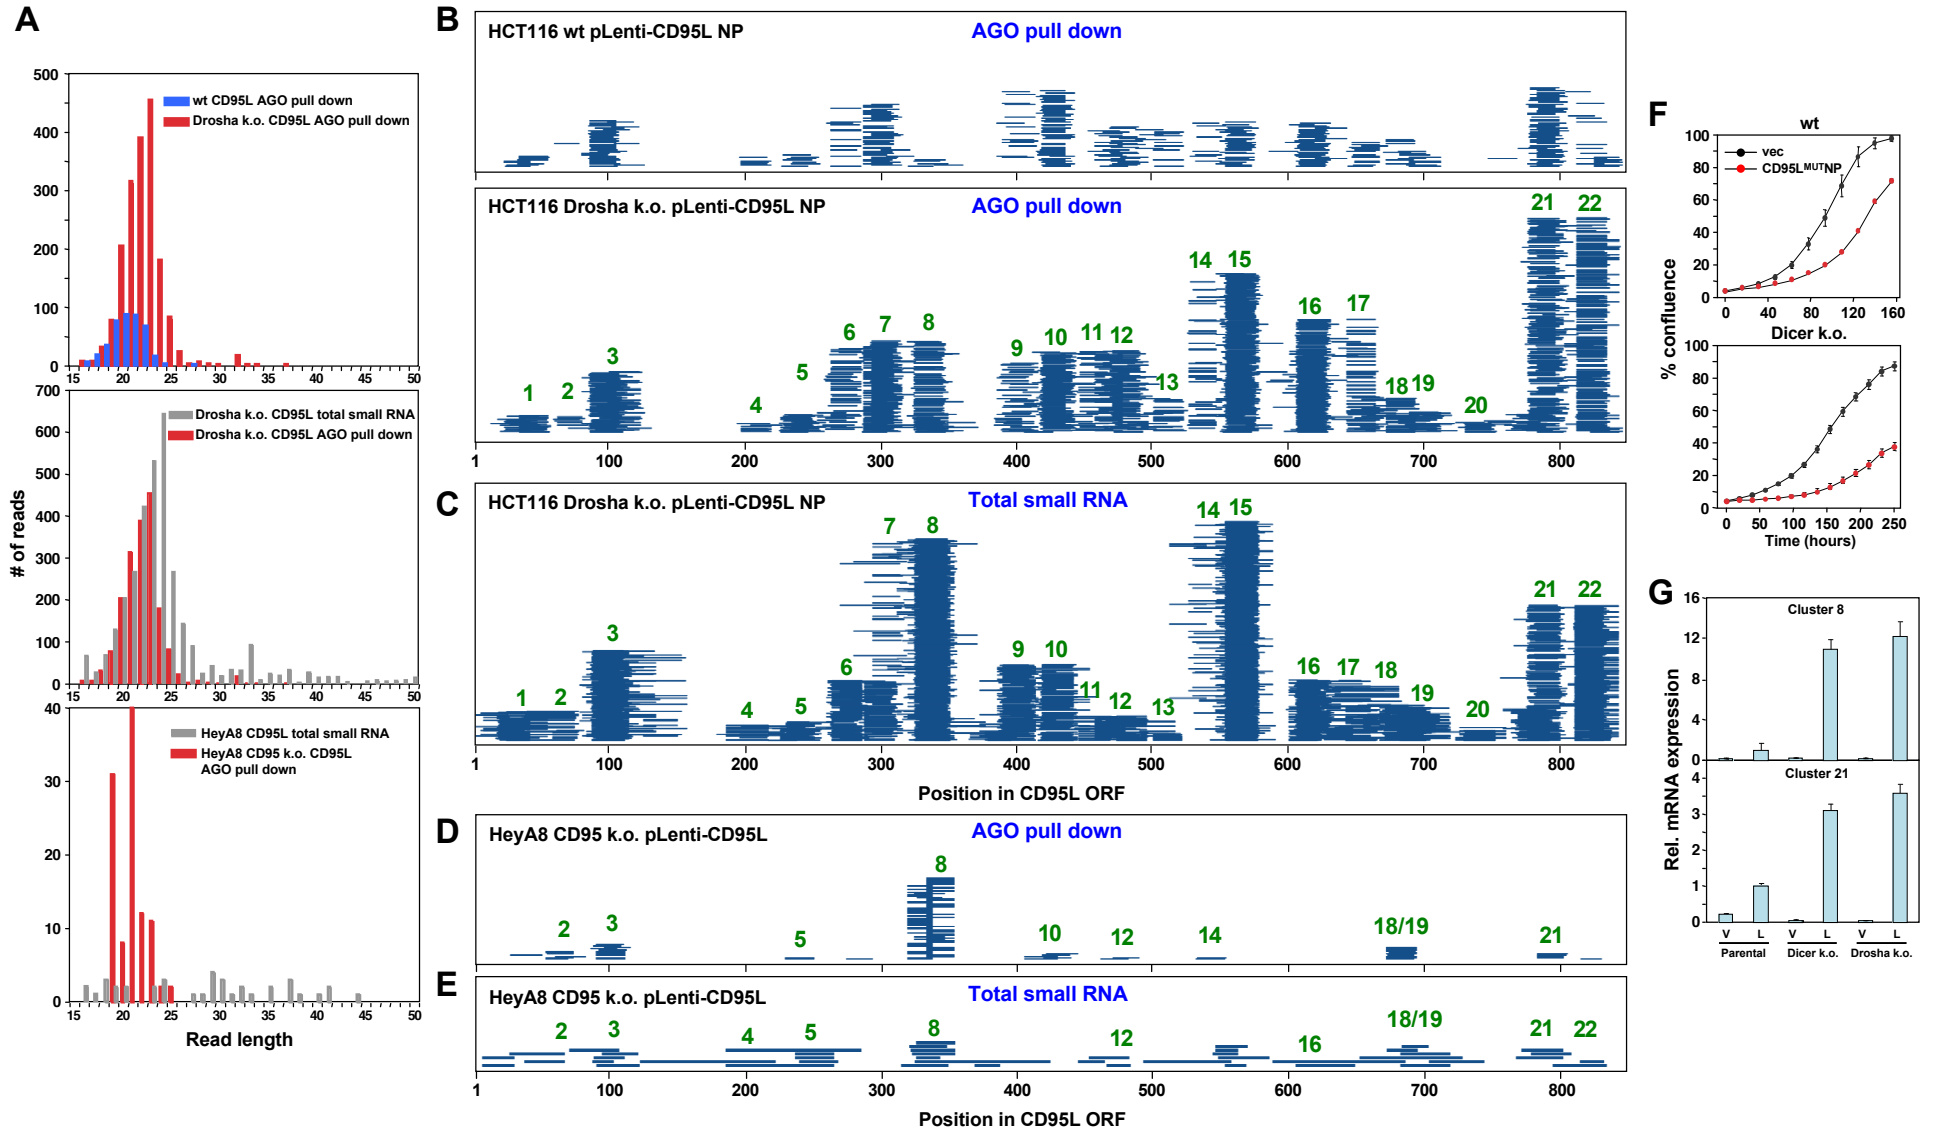

Figure 4 - figure suppl. 1

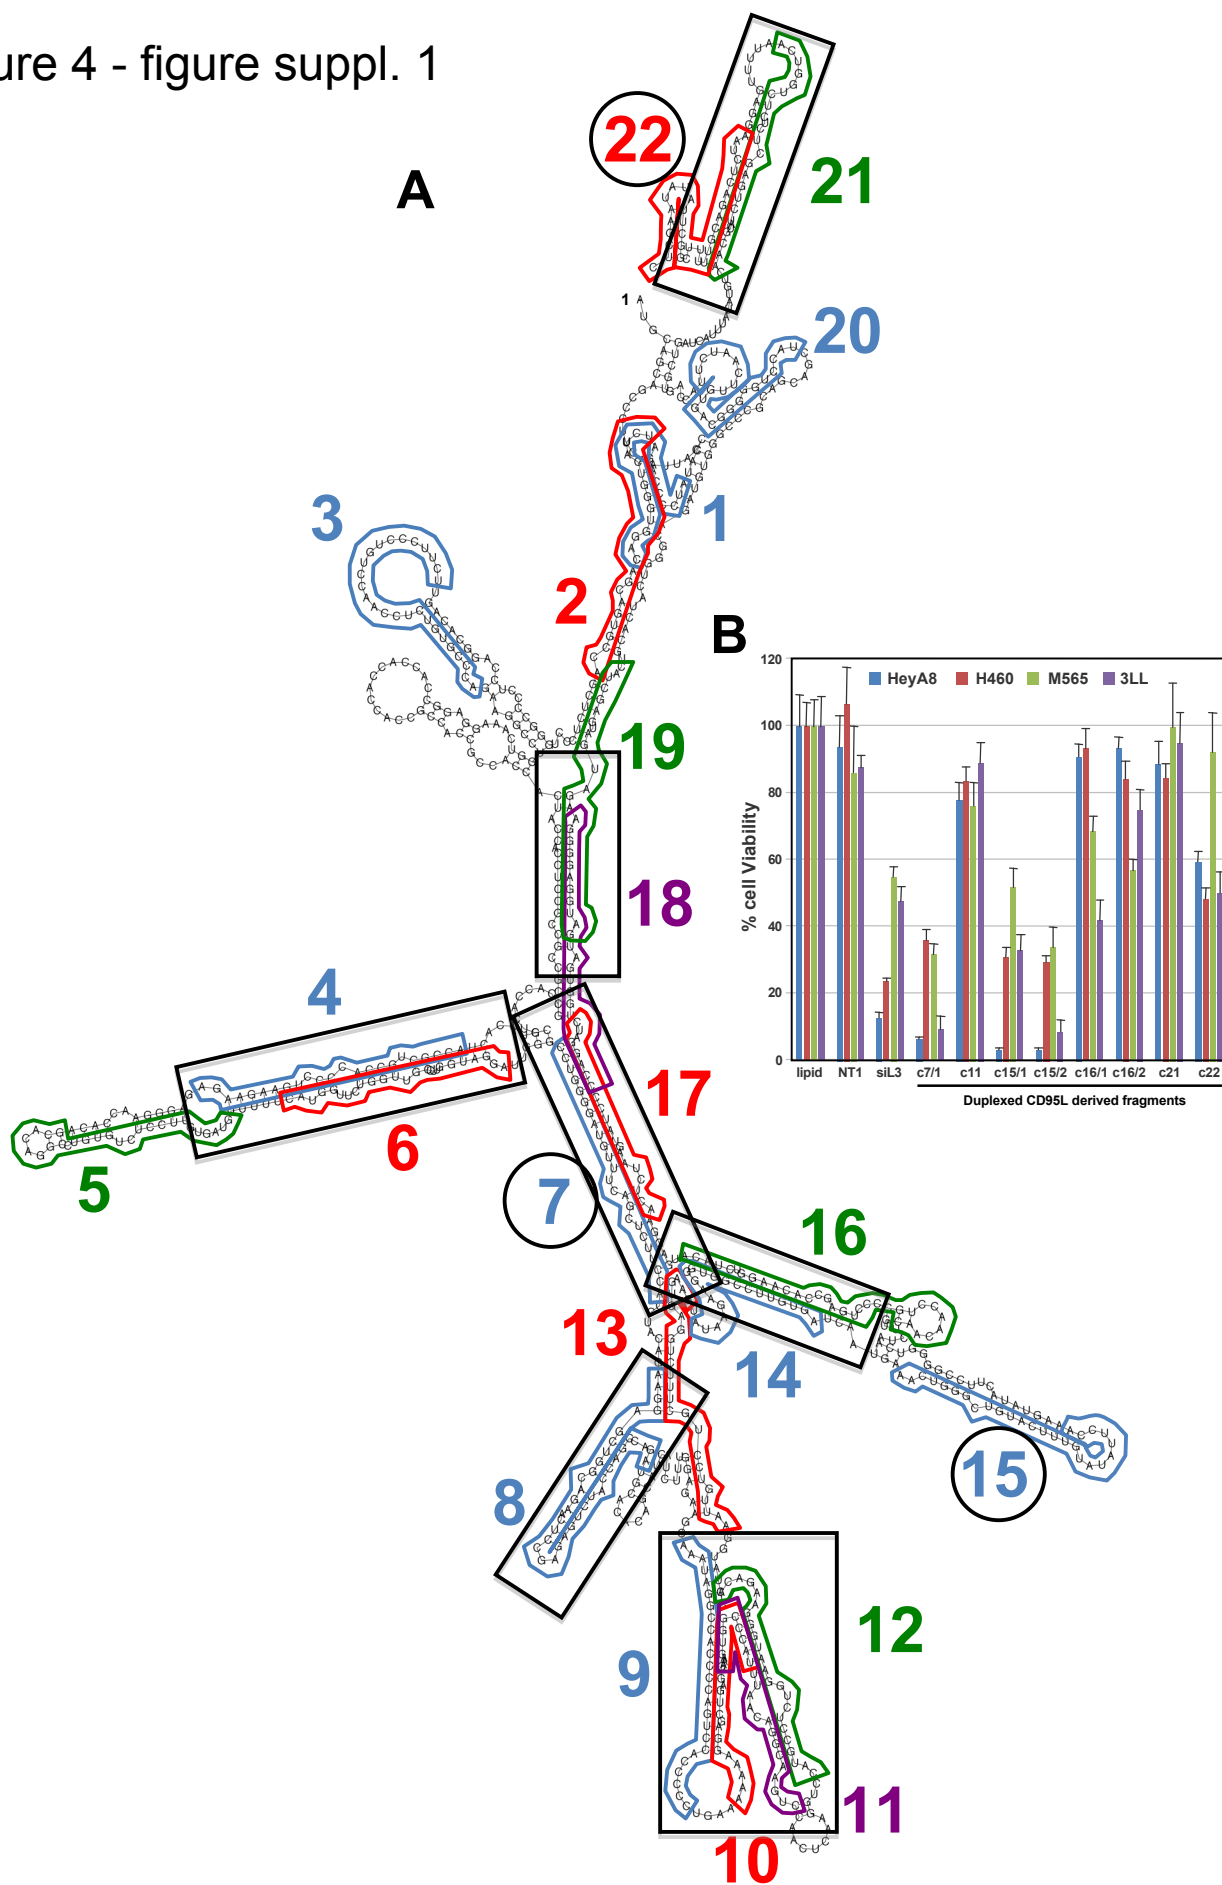

Source: https://www.biorxiv.org/content/10.1101/330324v1.full.pdf
